# Supplementary material
Source: MDPI journal article supplement (https://www.mdpi.com/2410-3888/8/7/383)

**C3**

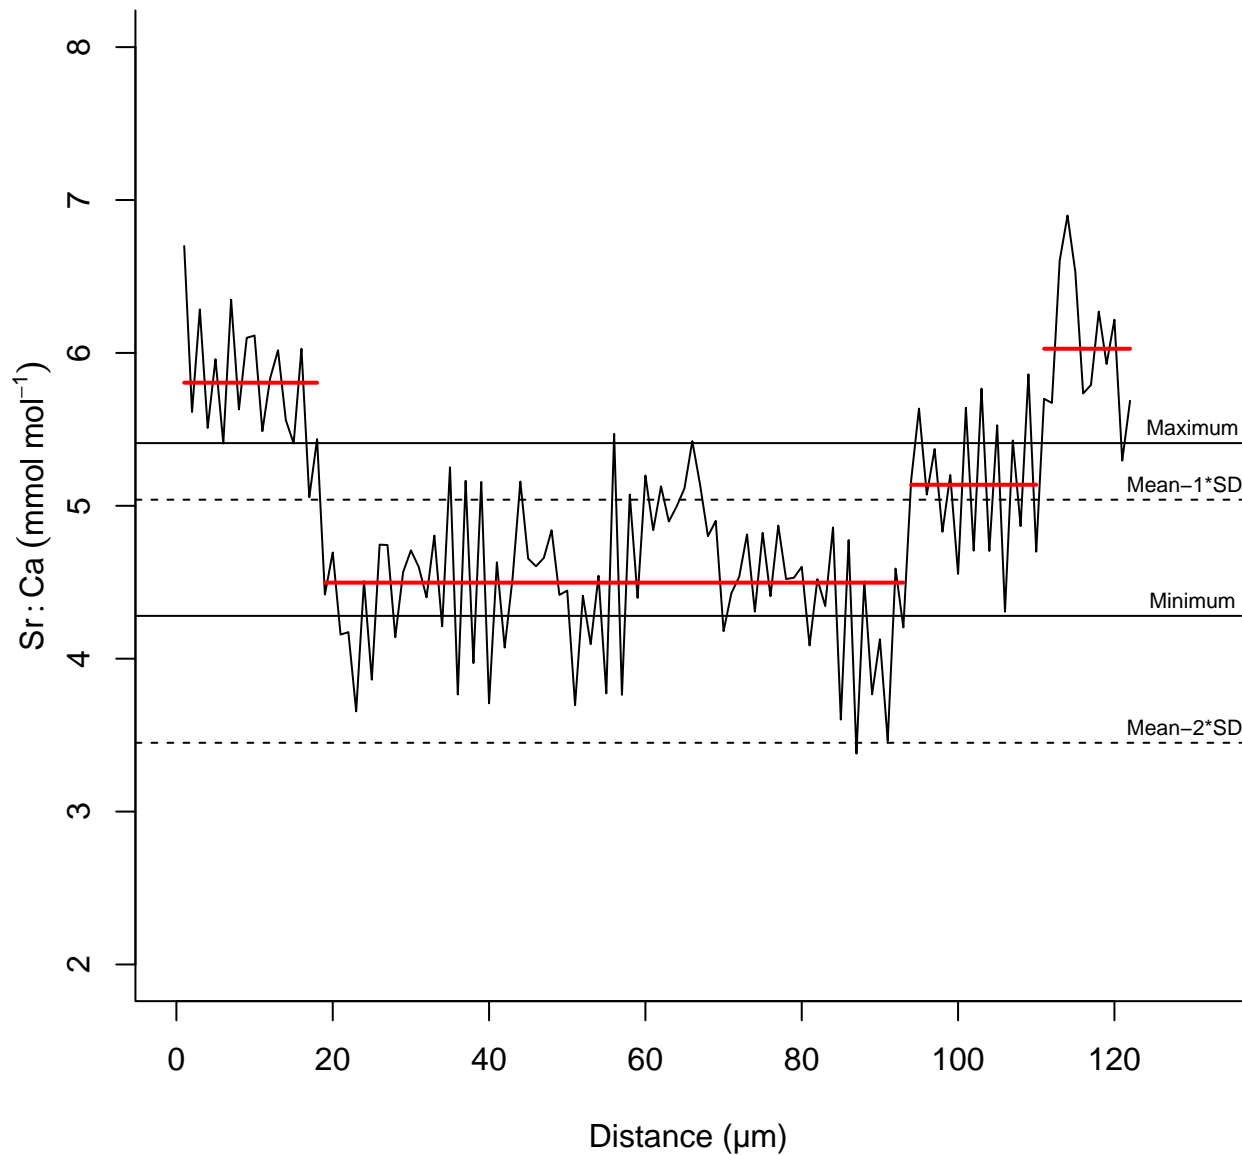

Supplement: s1 [file s1]

**A2**

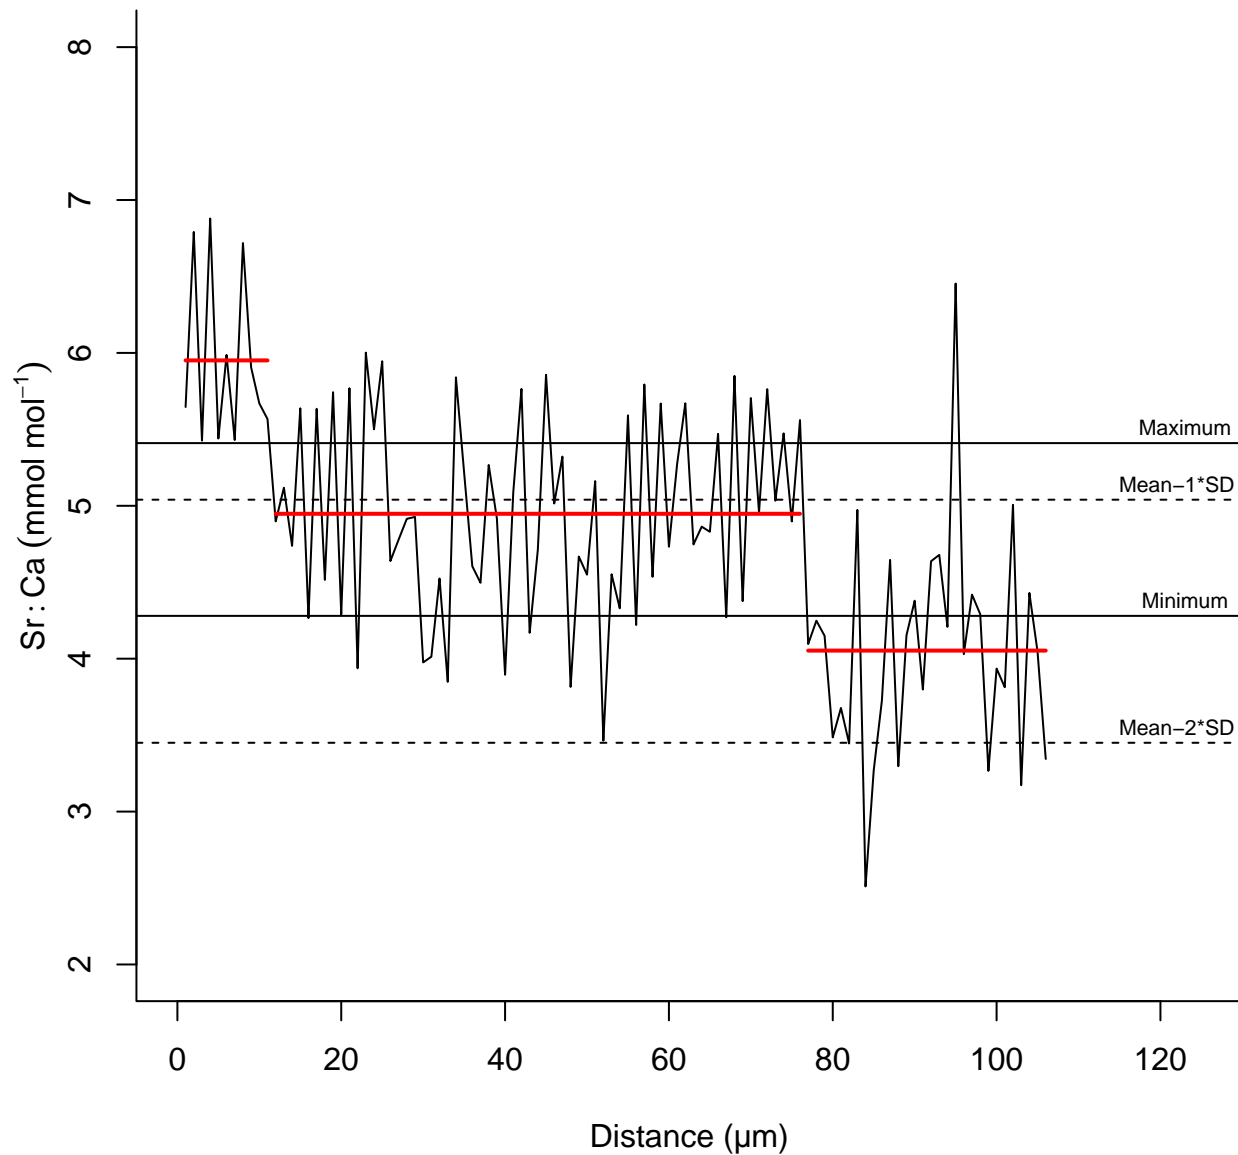

Supplement: s1 [file s1]

**A5**

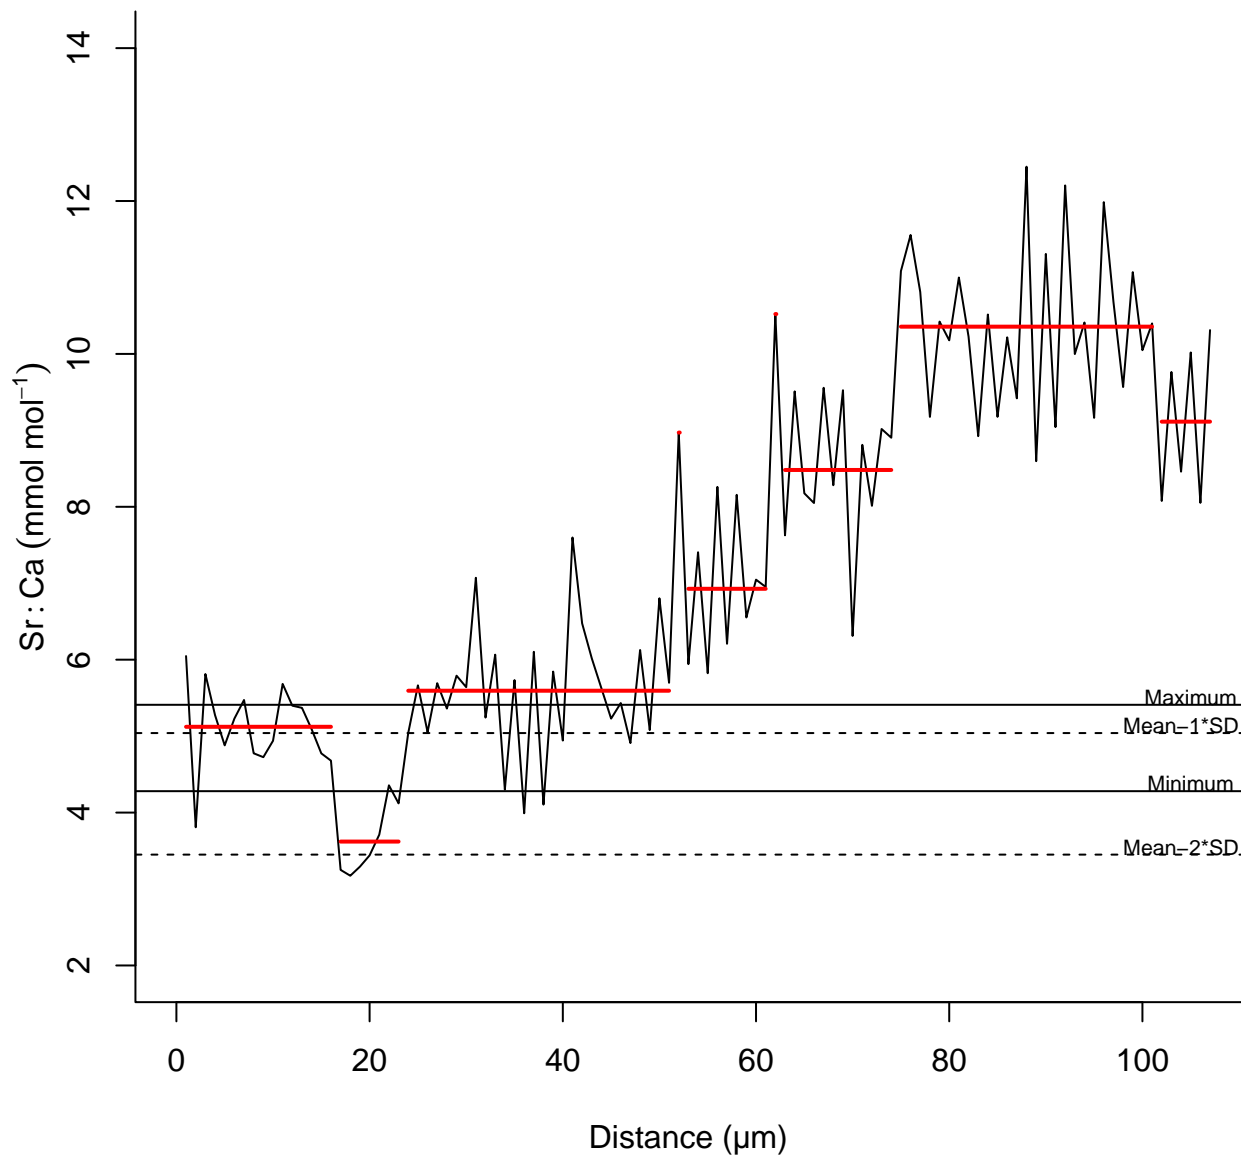

Supplement: s1 [file s1]

**D5**

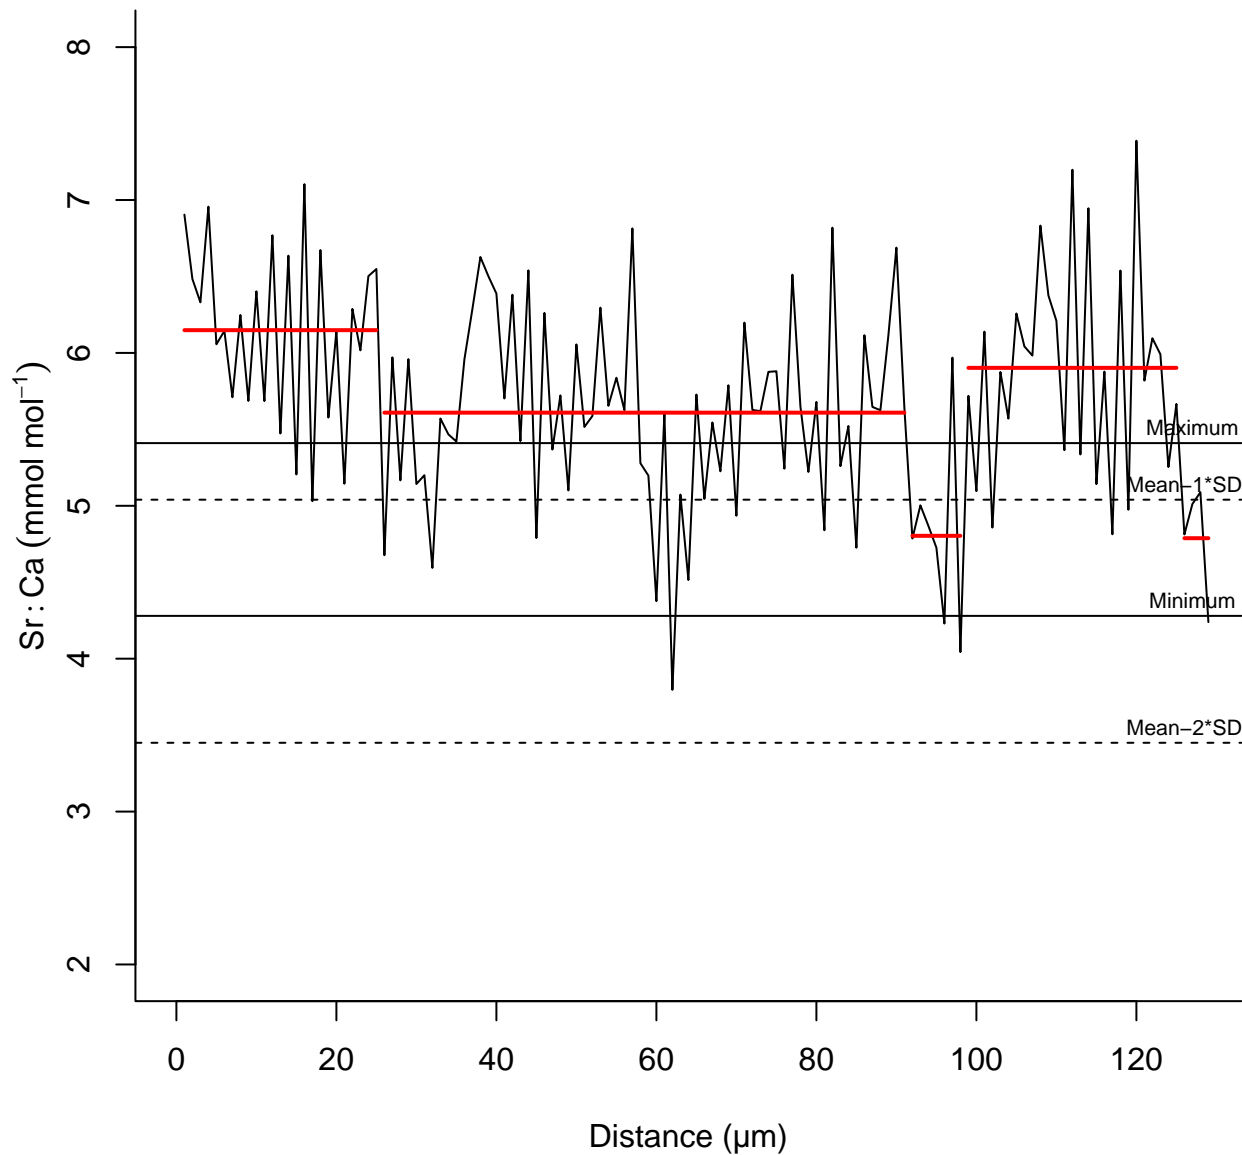

Supplement: s1 [file s1]

E1

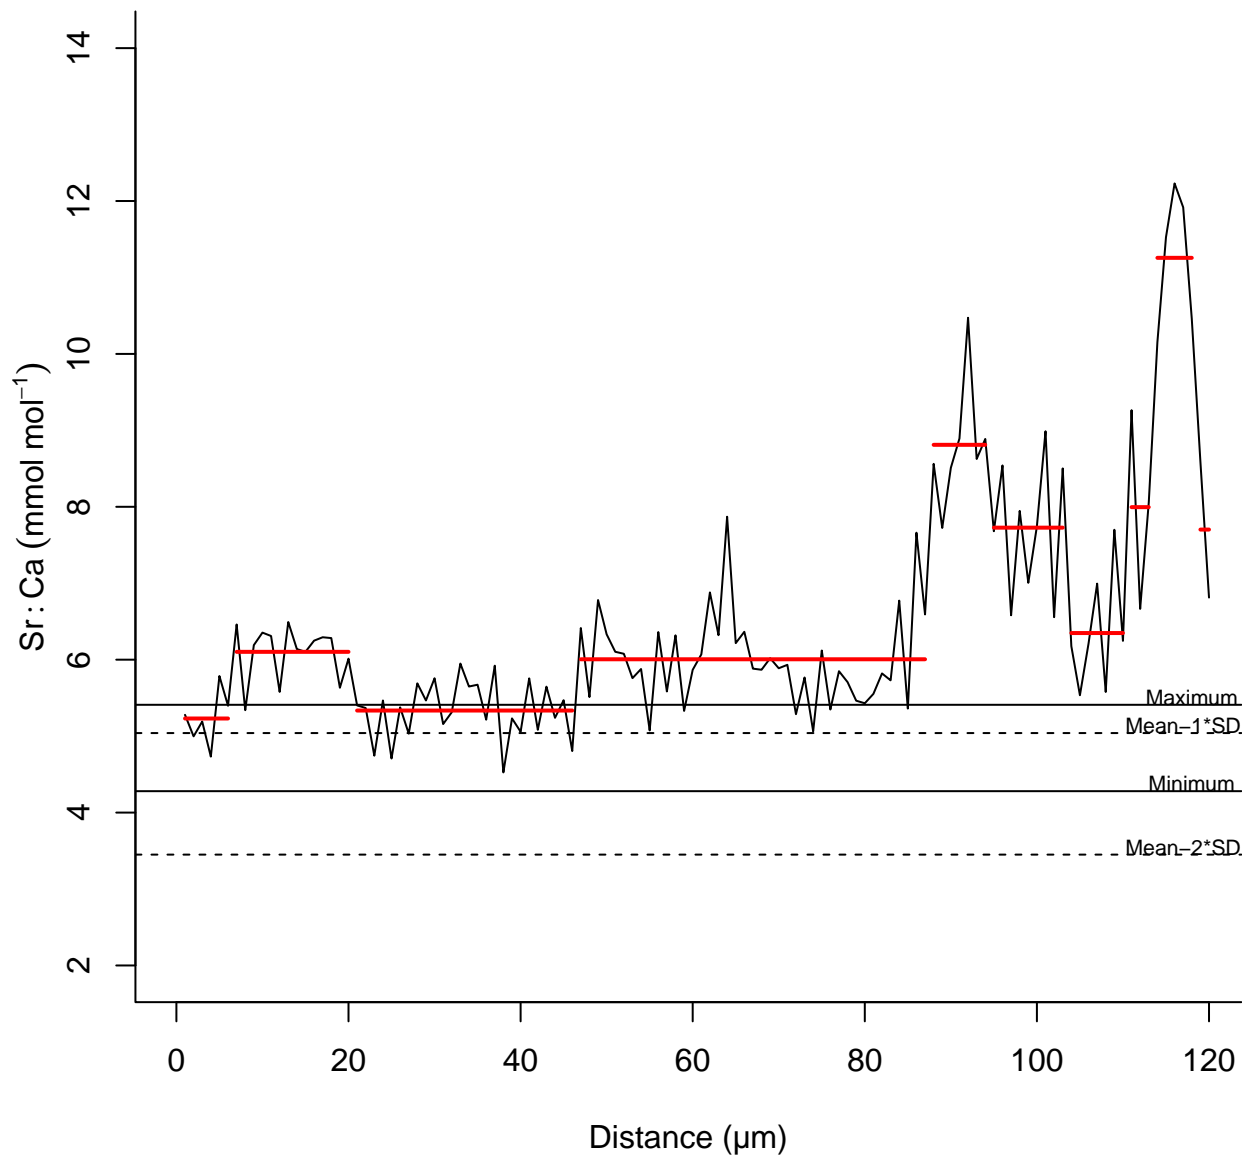

Supplement: s1 [file s1]

**D6**

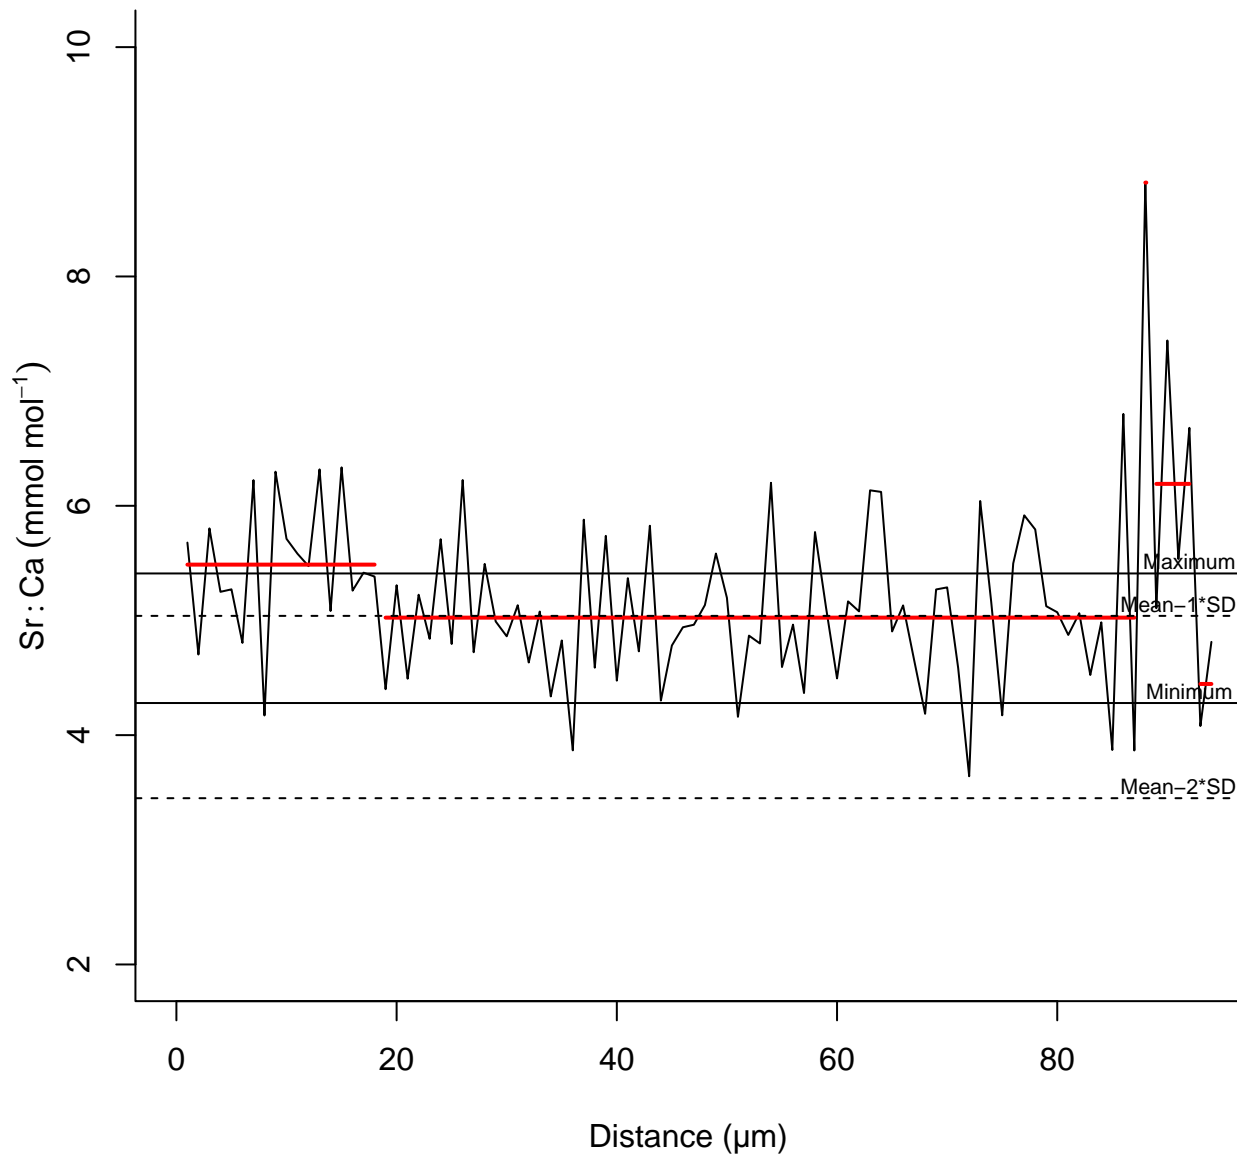

Supplement: s1 [file s1]

**A3**

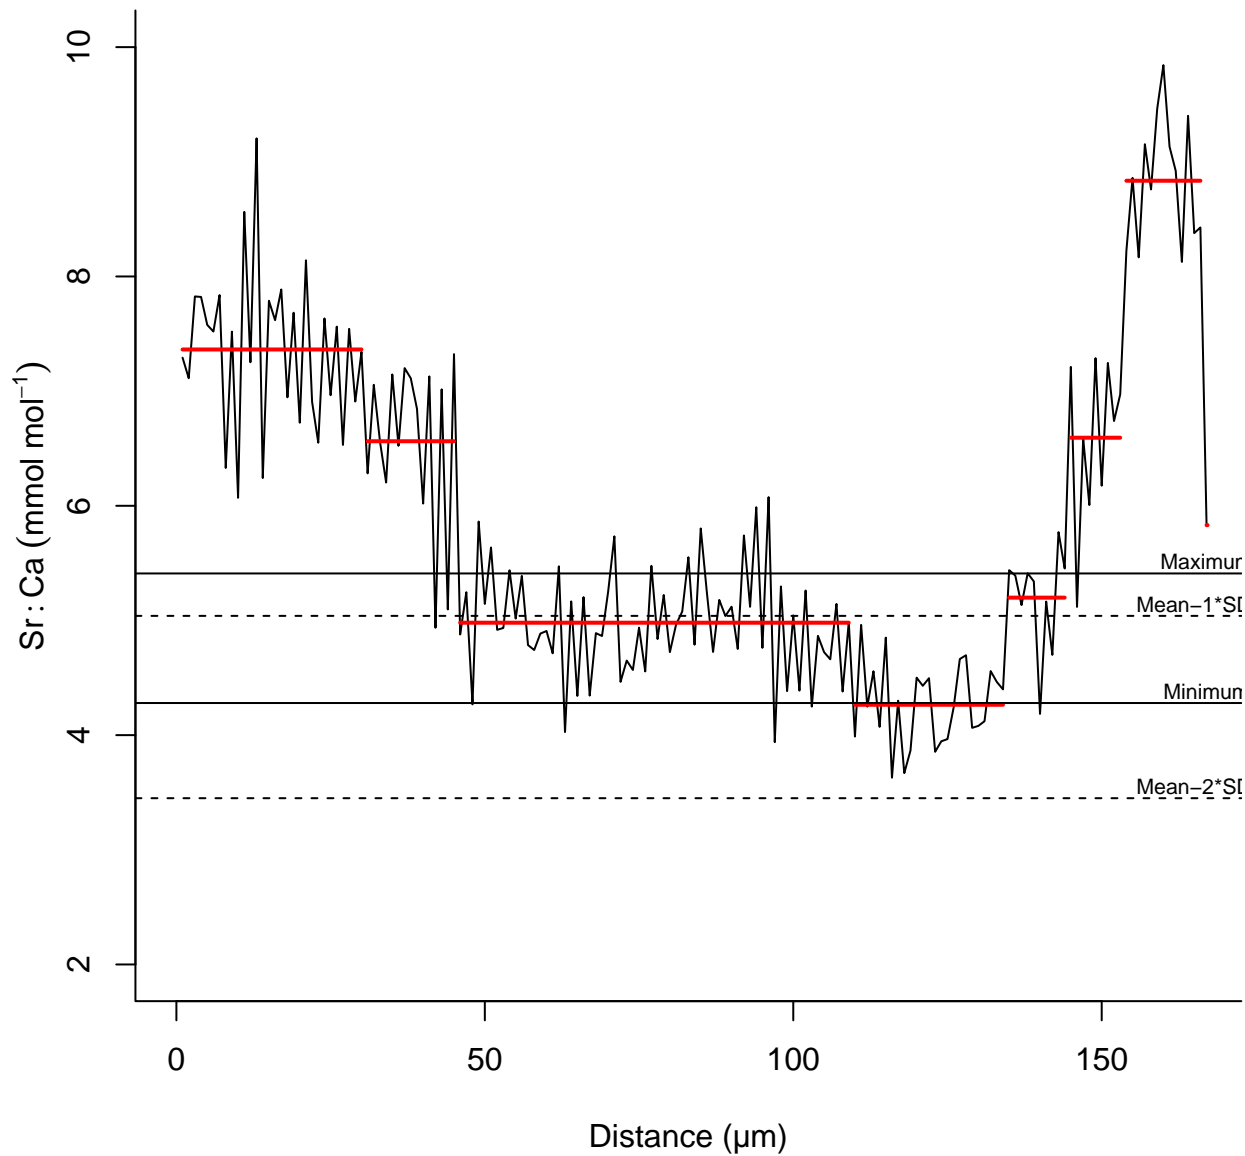

Supplement: s1 [file s1]

**F4**

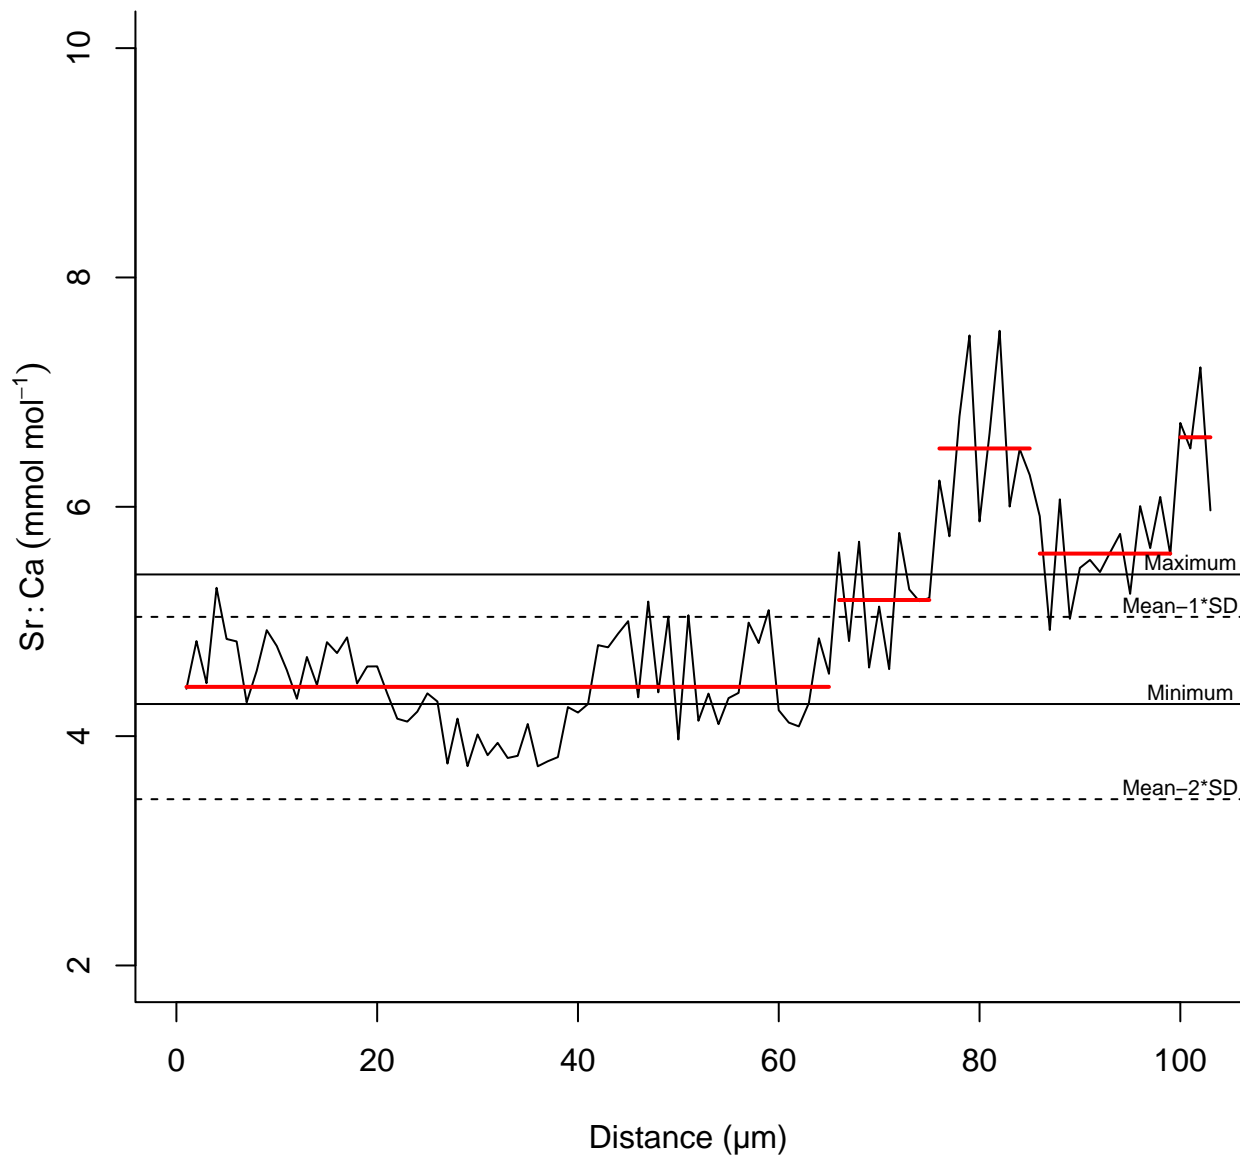

Supplement: s1 [file s1]

**E3**

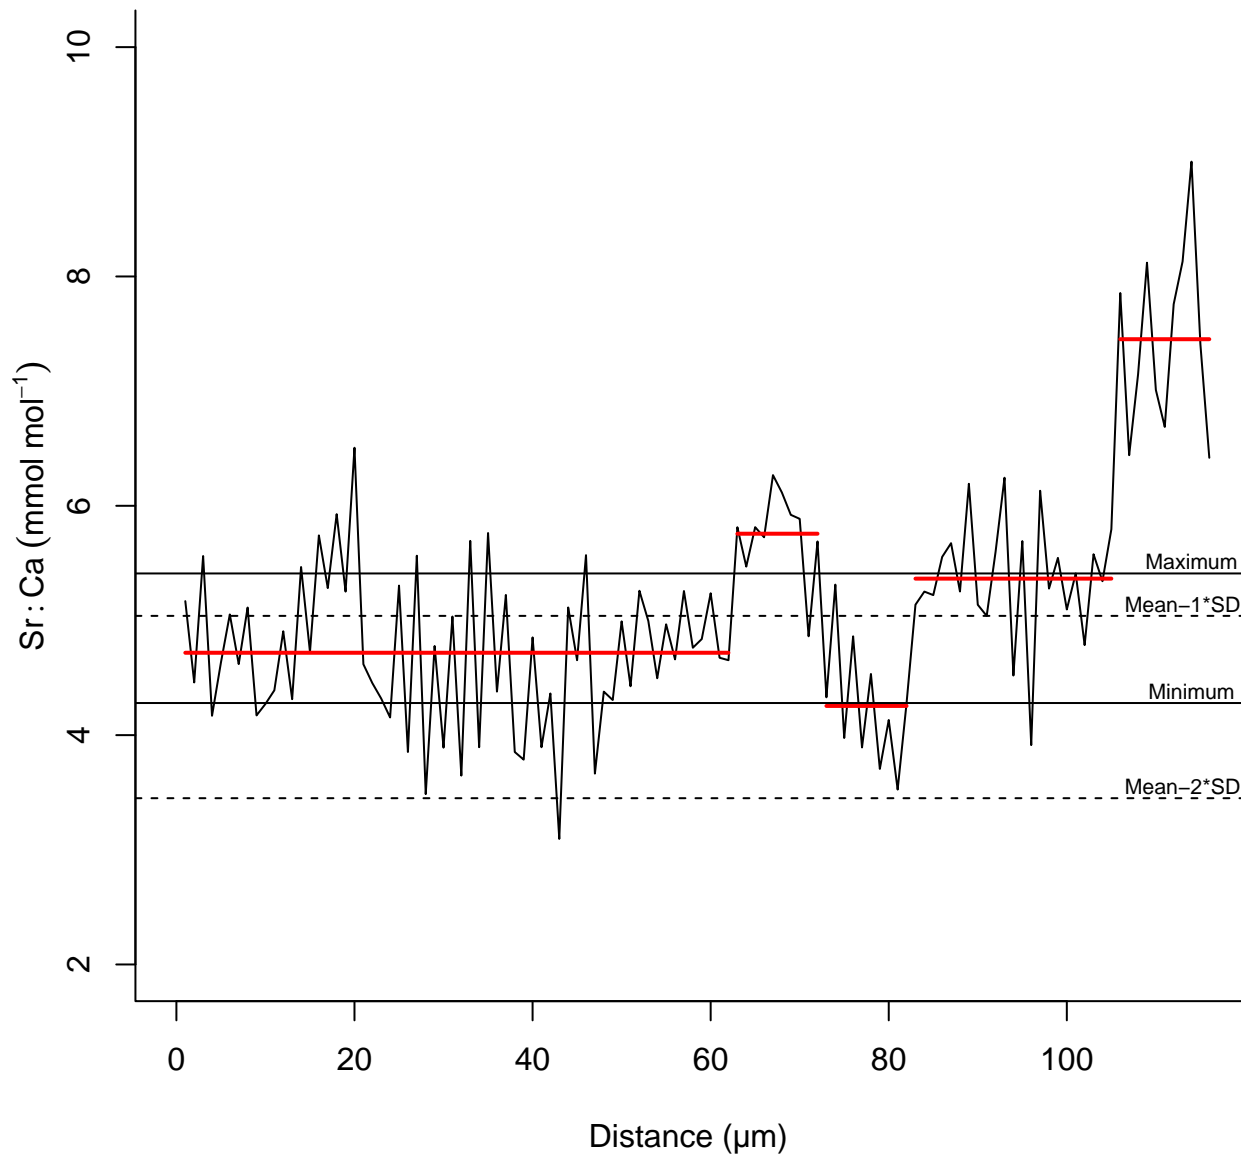

Supplement: s1 [file s1]

**F5**

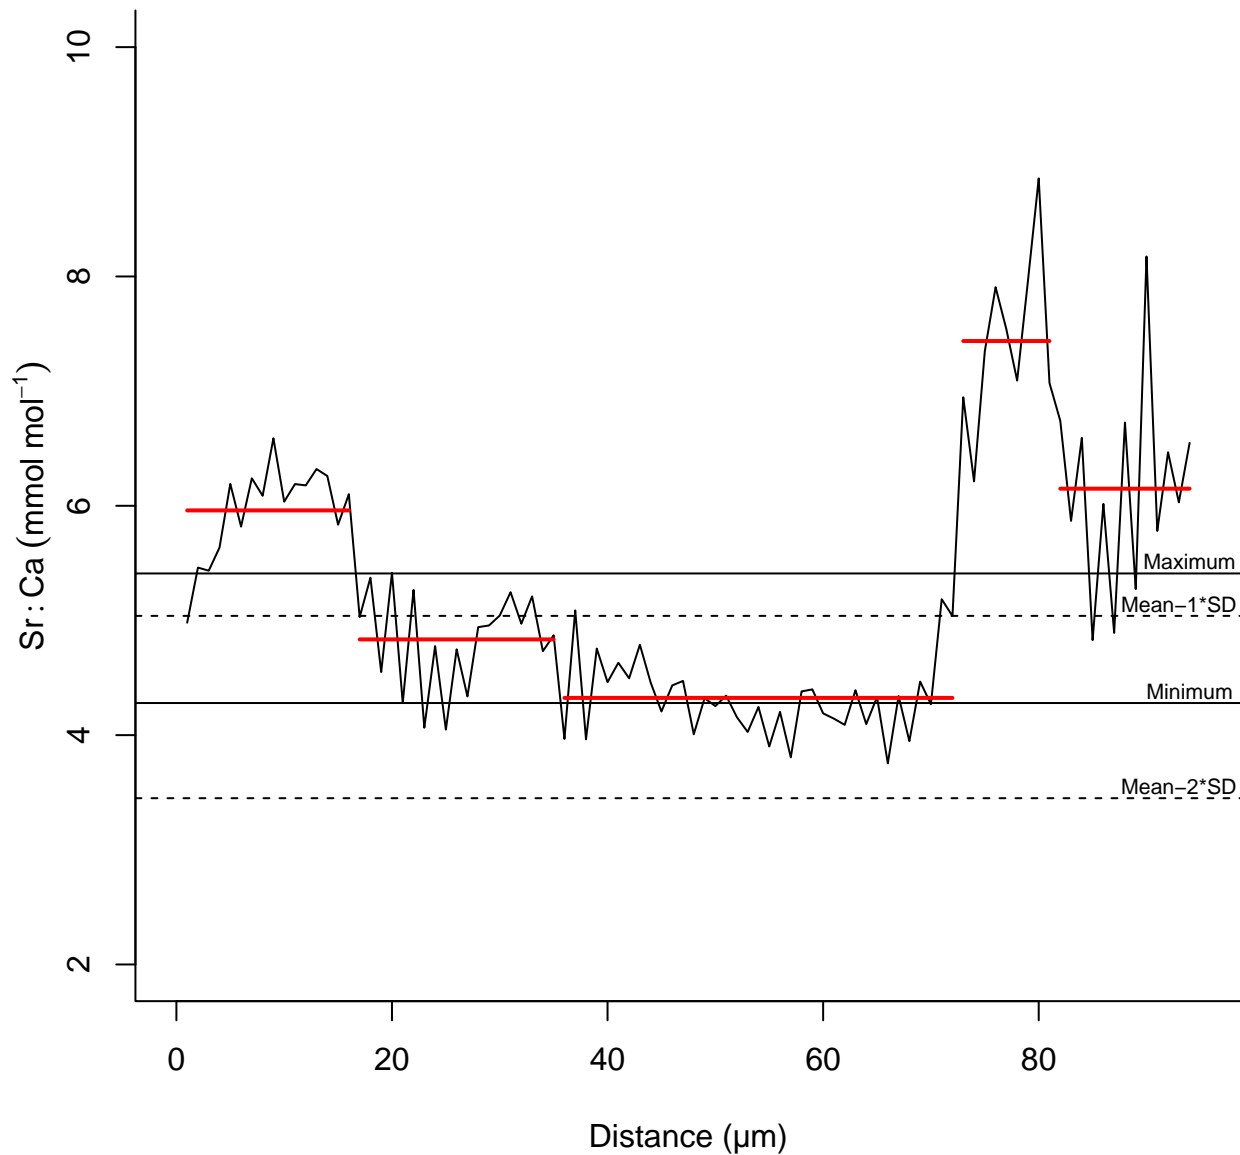

Supplement: s1 [file s1]

**D3**

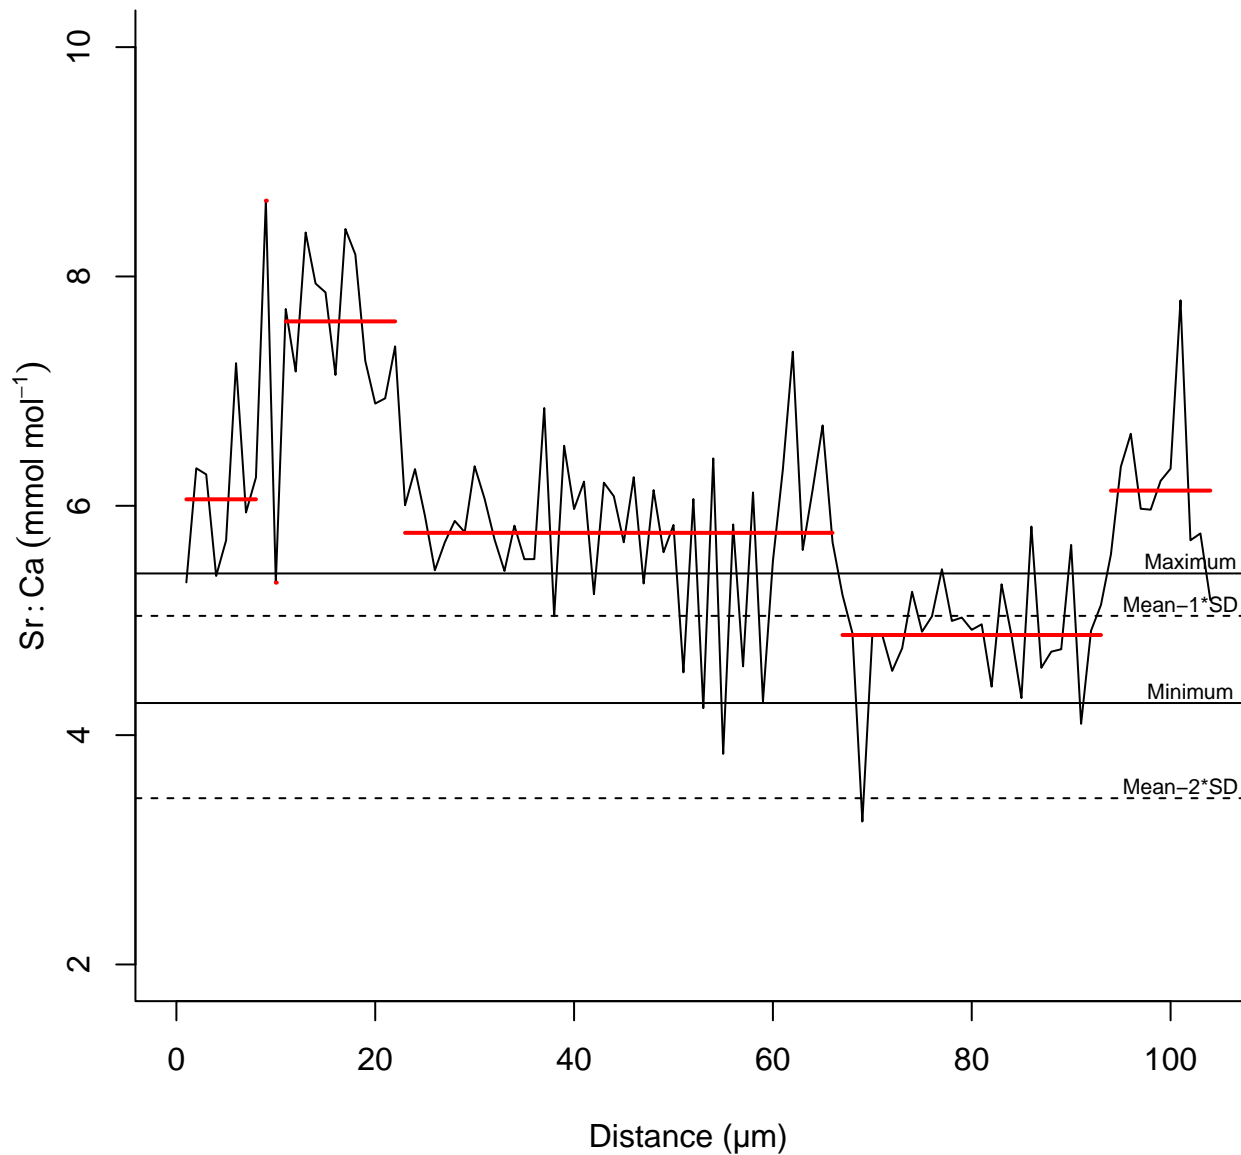

Supplement: s1 [file s1]

# F3R3

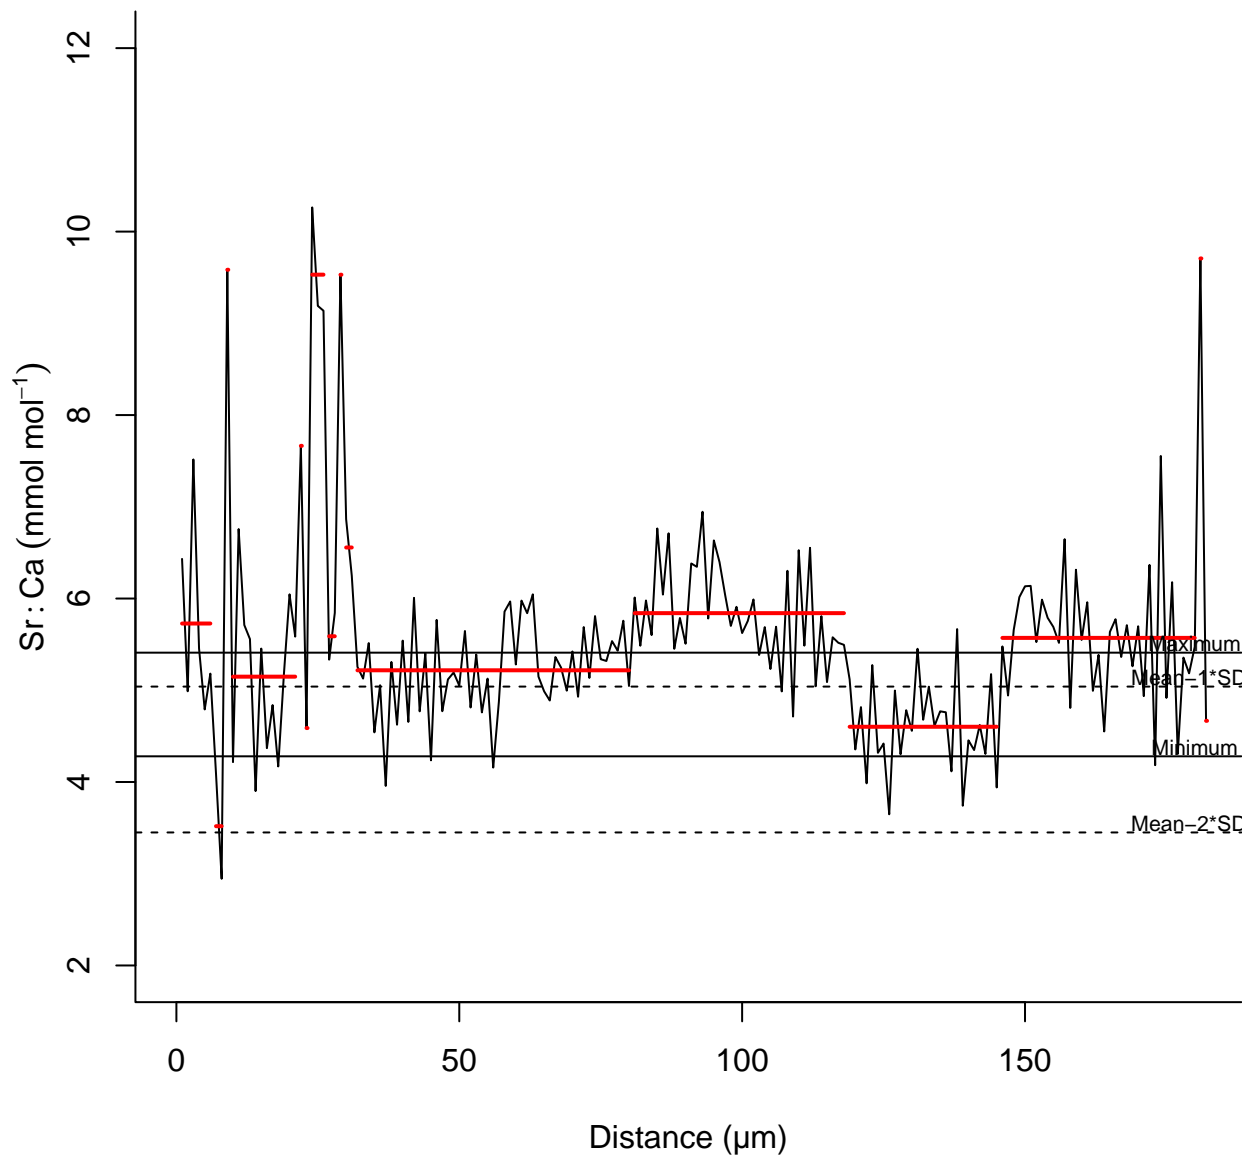

Supplement: s1 [file s1]

**C4**

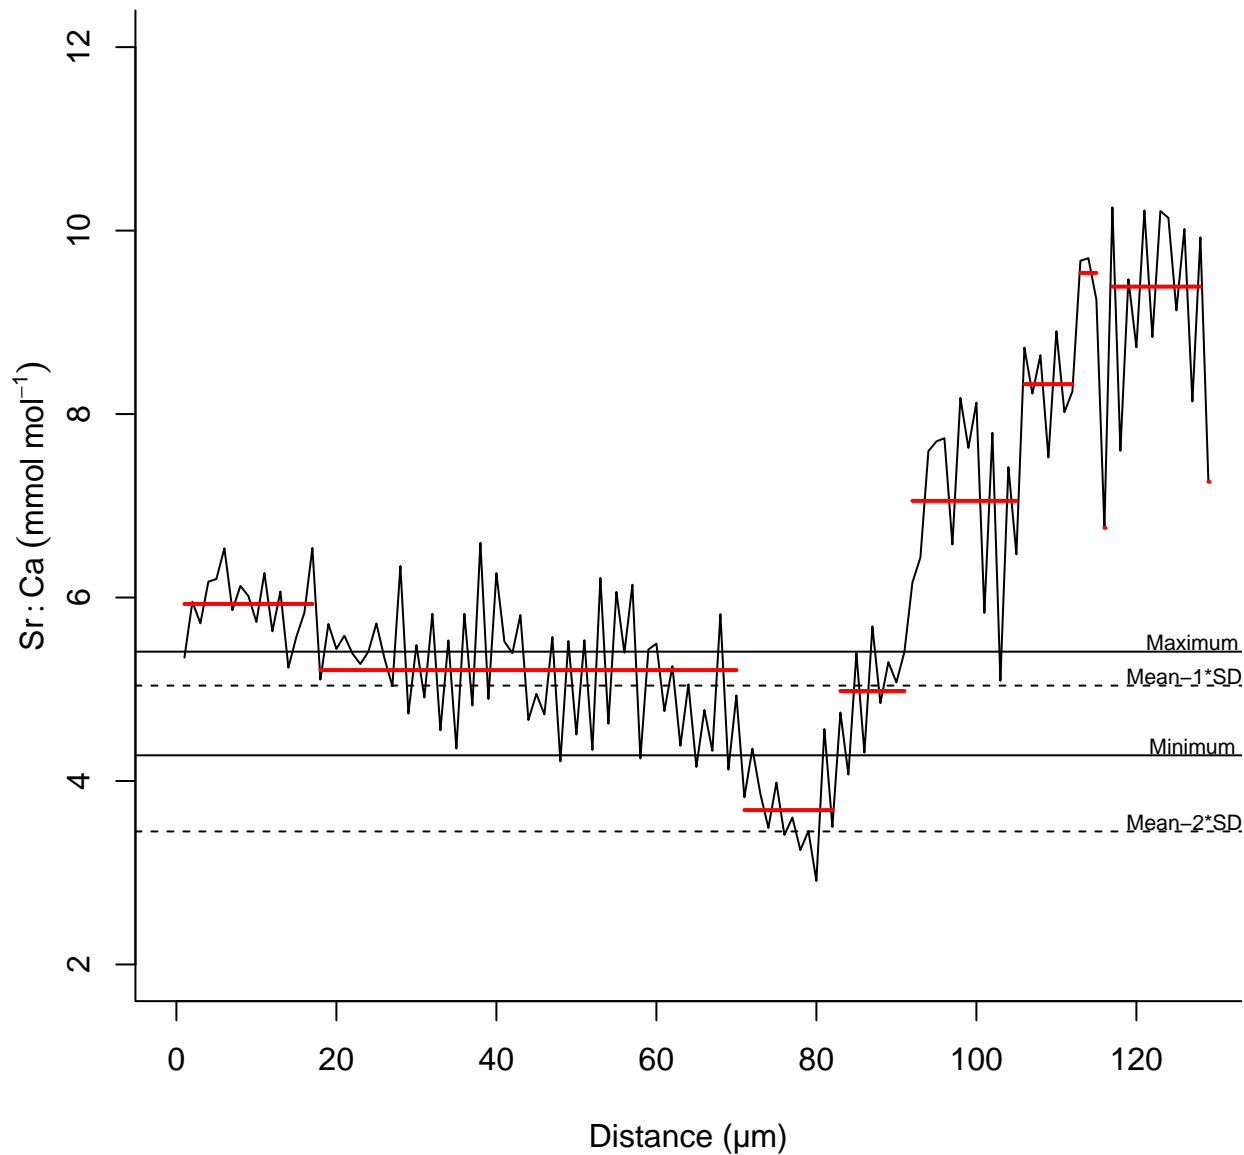

Supplement: s1 [file s1]

**C6**

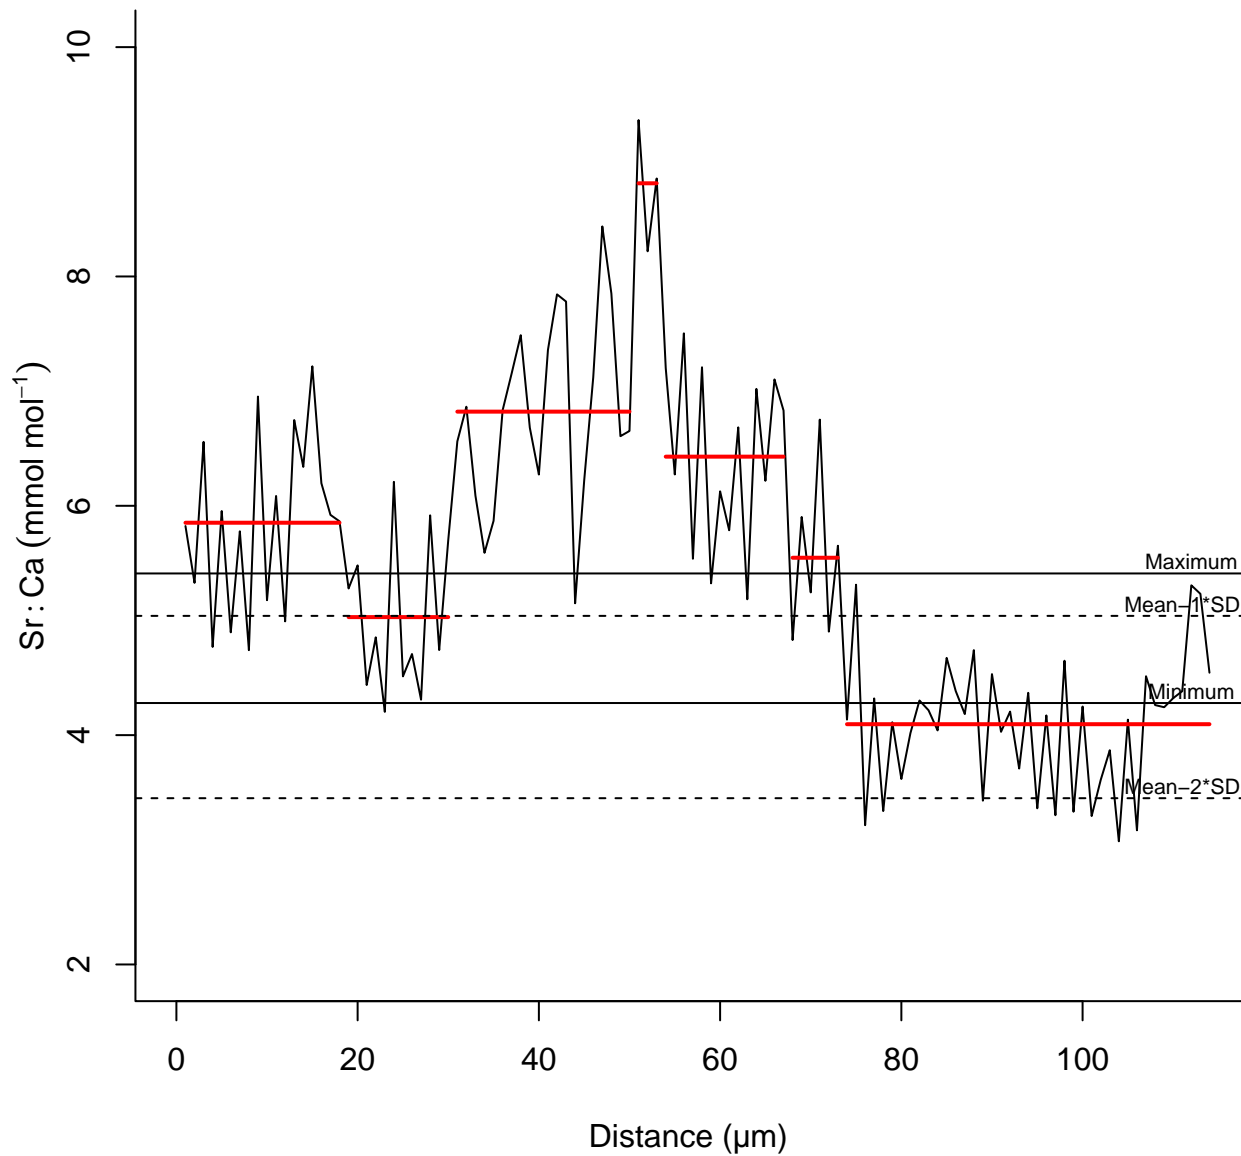

Supplement: s1 [file s1]

**A6**

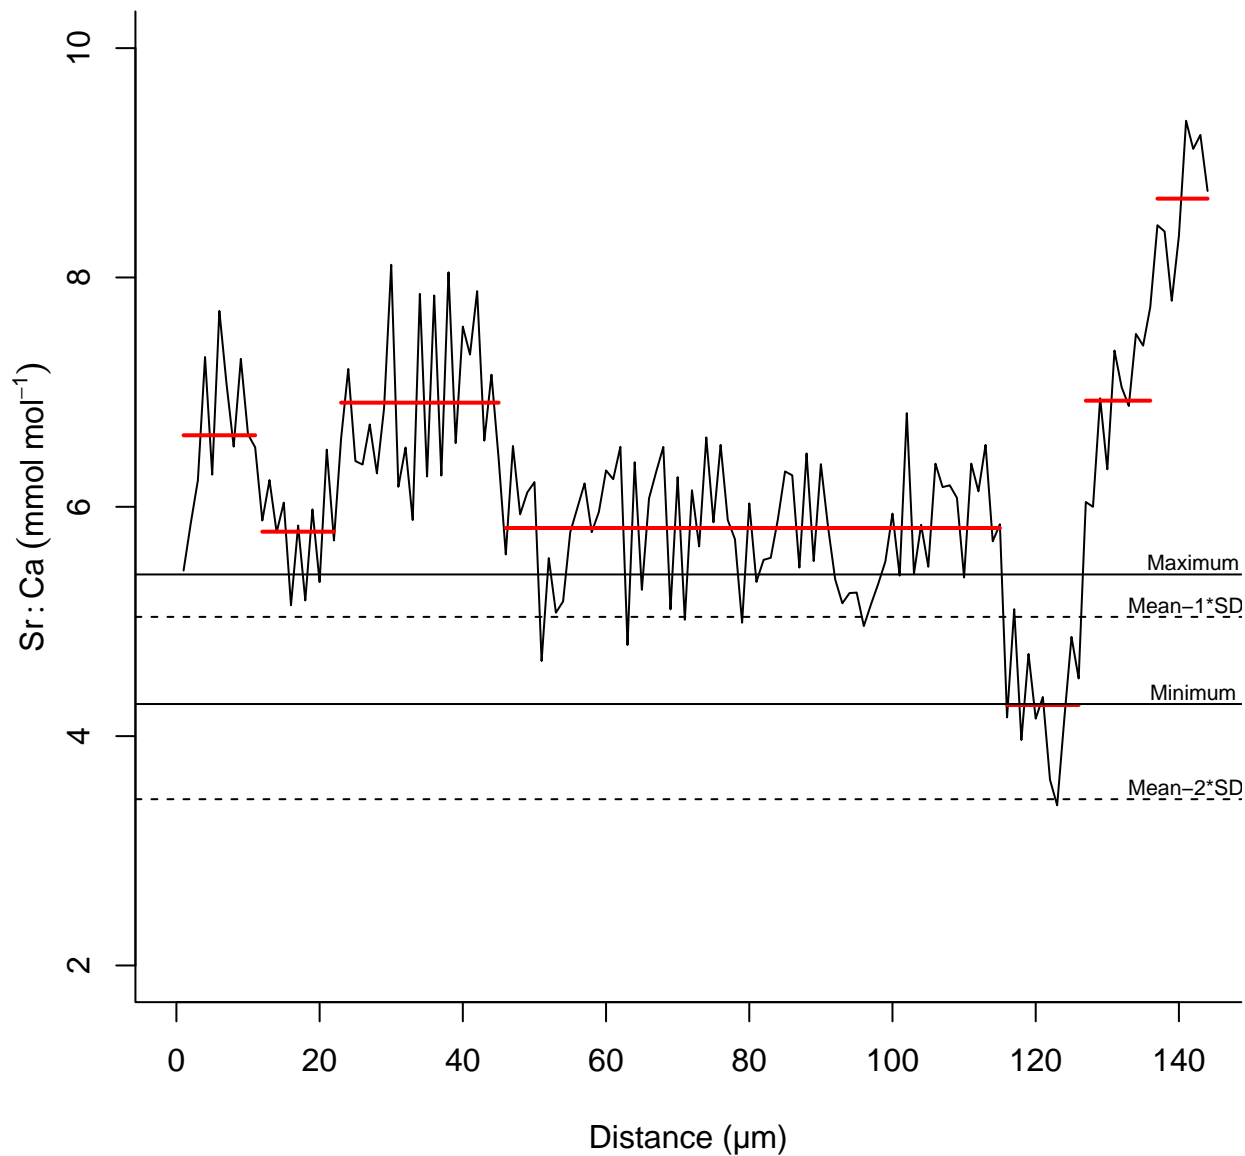

Supplement: s1 [file s1]

**E5**

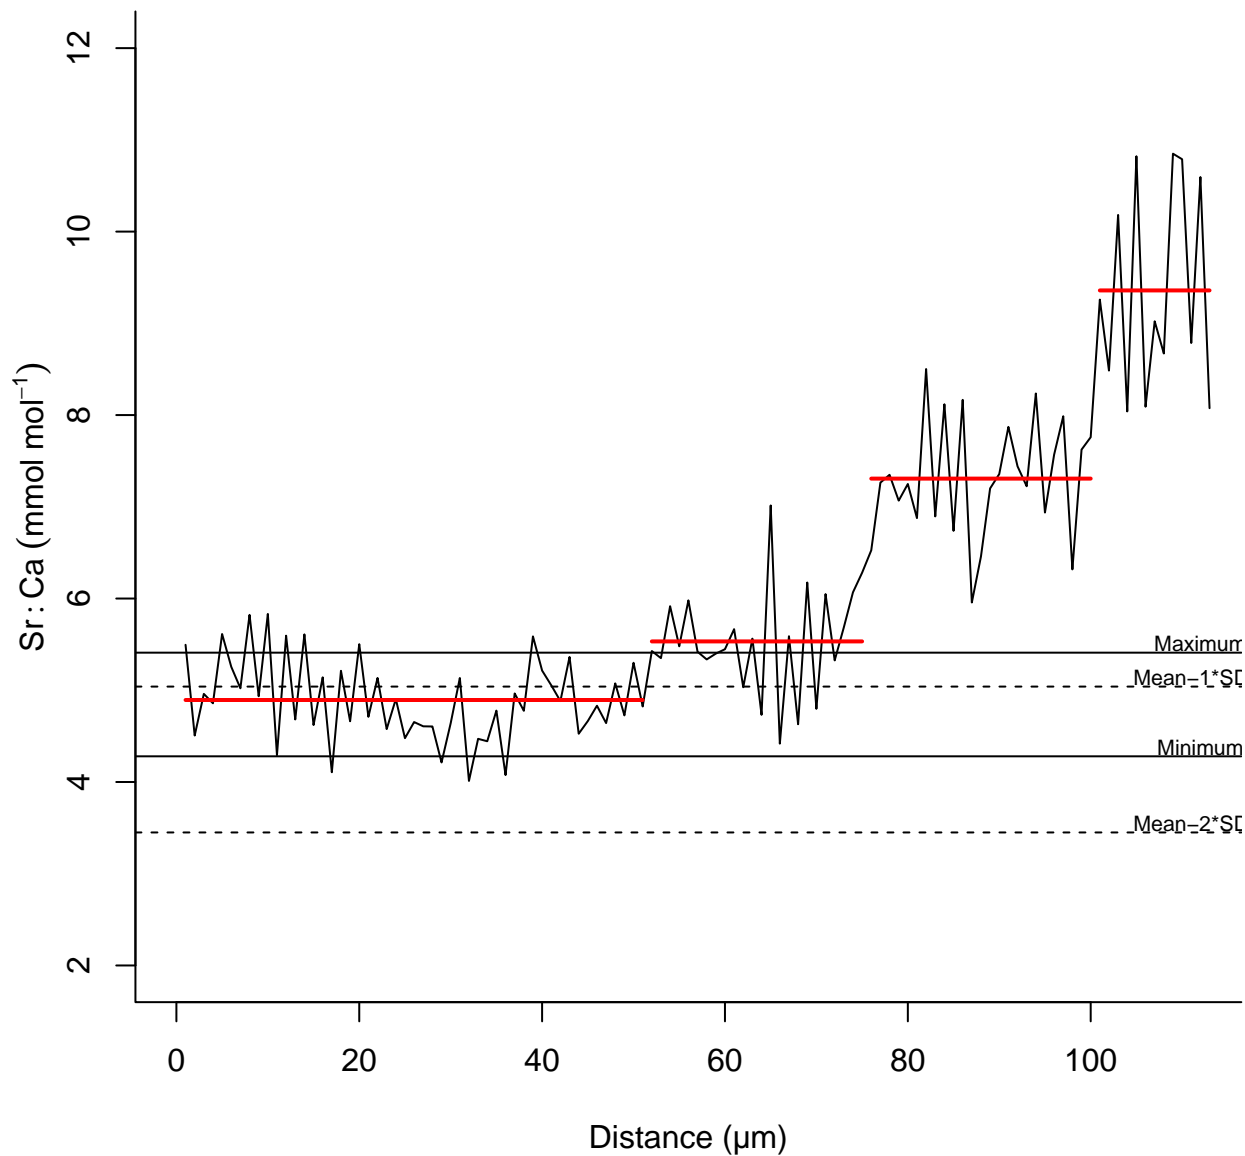

Supplement: s1 [file s1]

**F2**

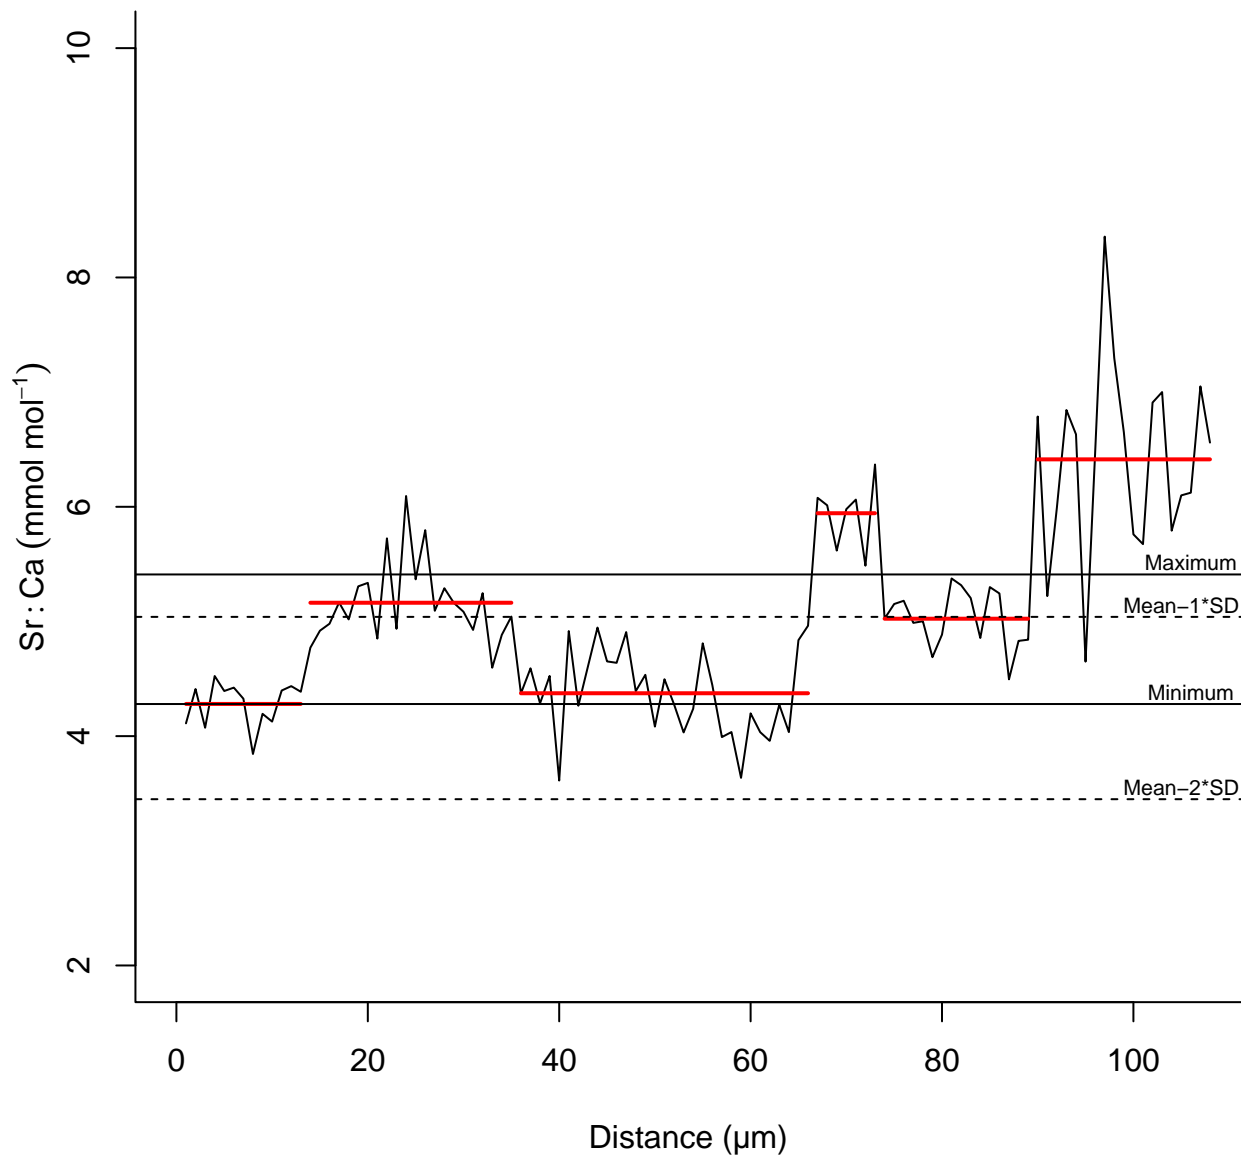

Supplement: s1 [file s1]

**B2**

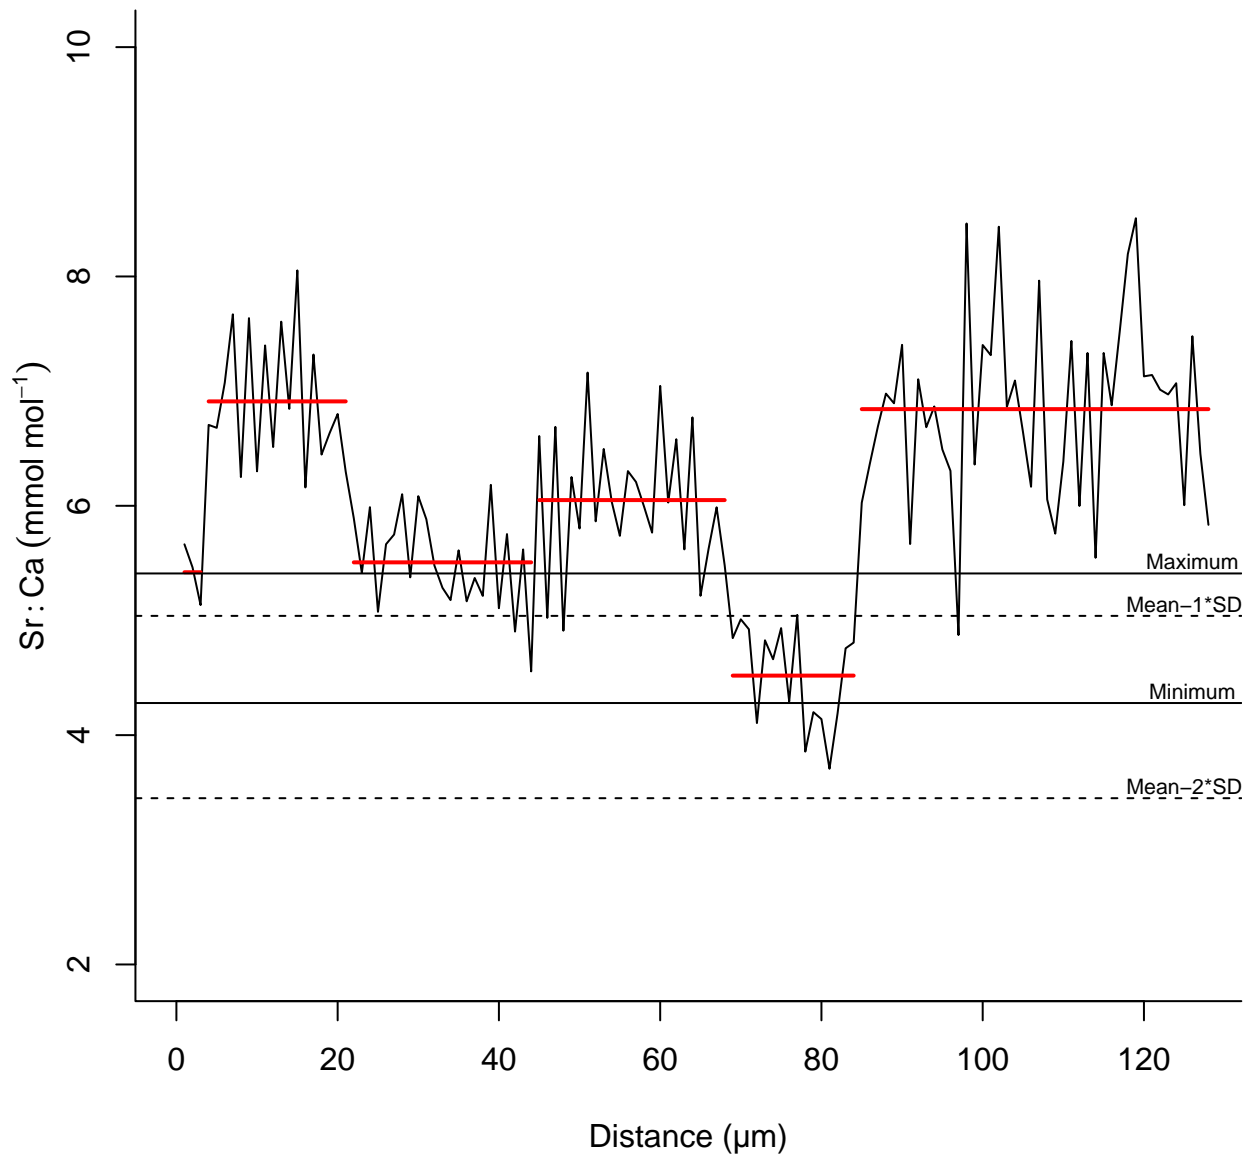

Supplement: s1 [file s1]

**B4**

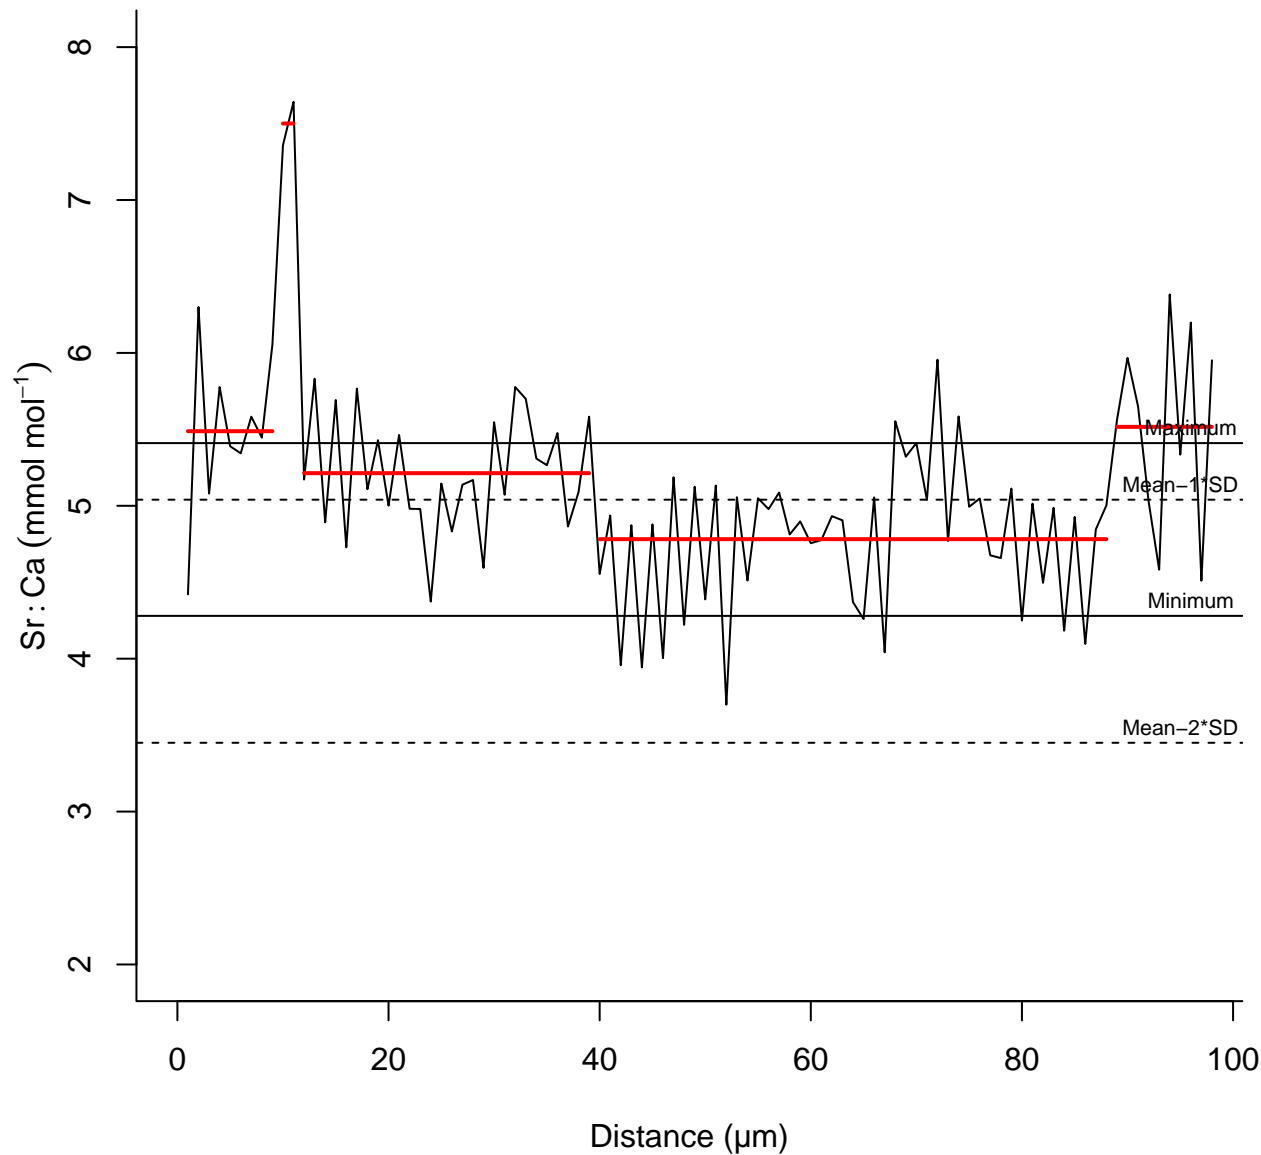

Supplement: s1 [file s1]

**A4**

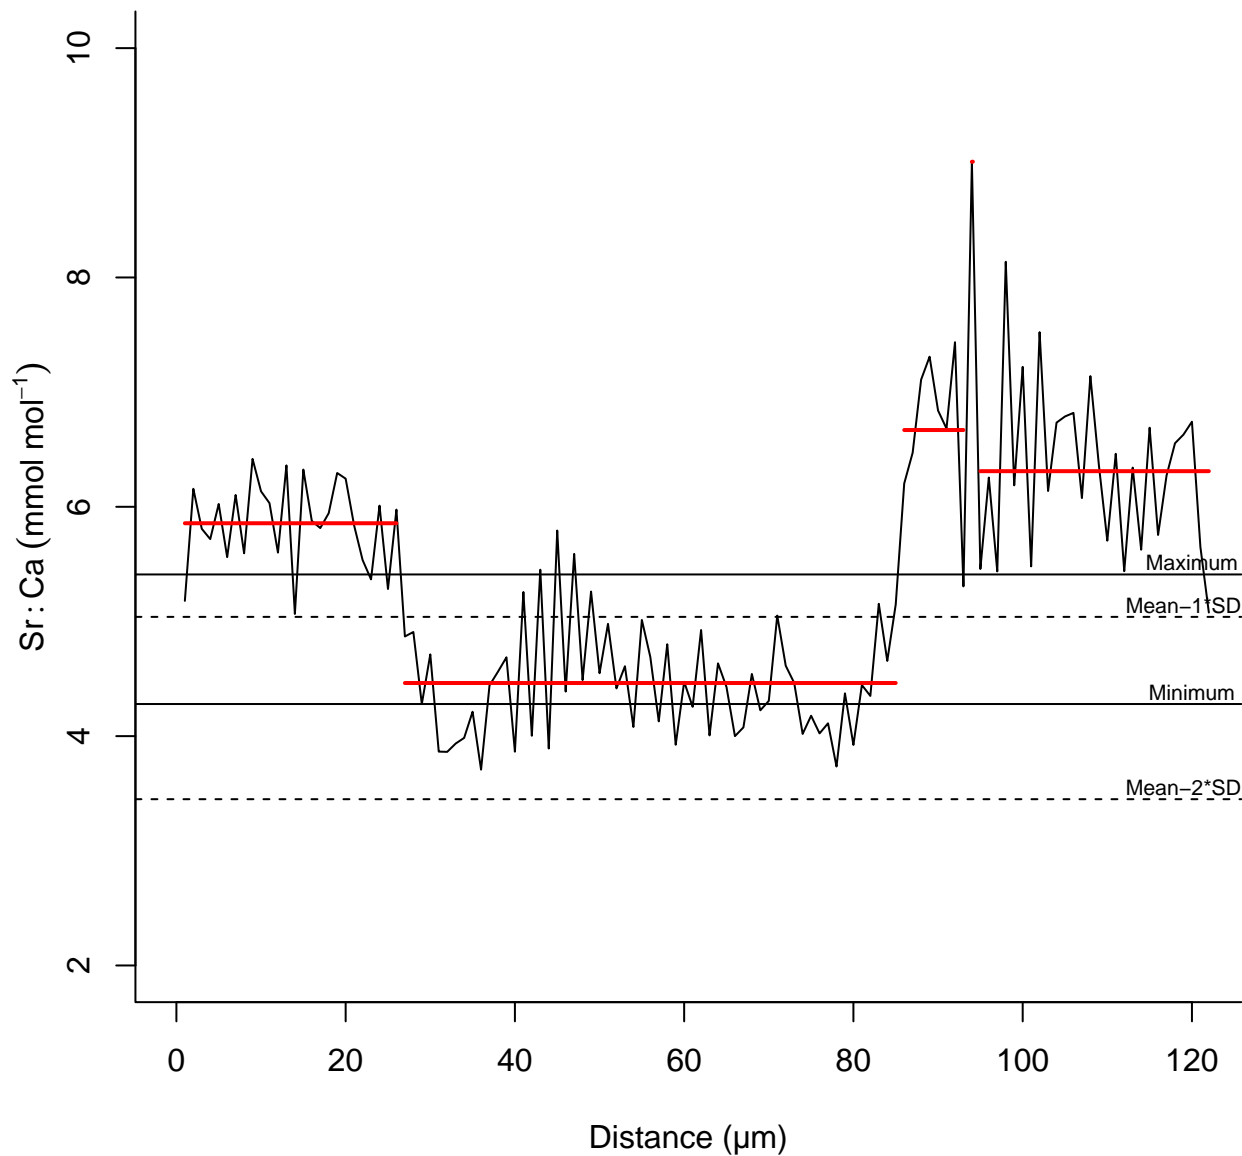

Supplement: s1 [file s1]

**D2**

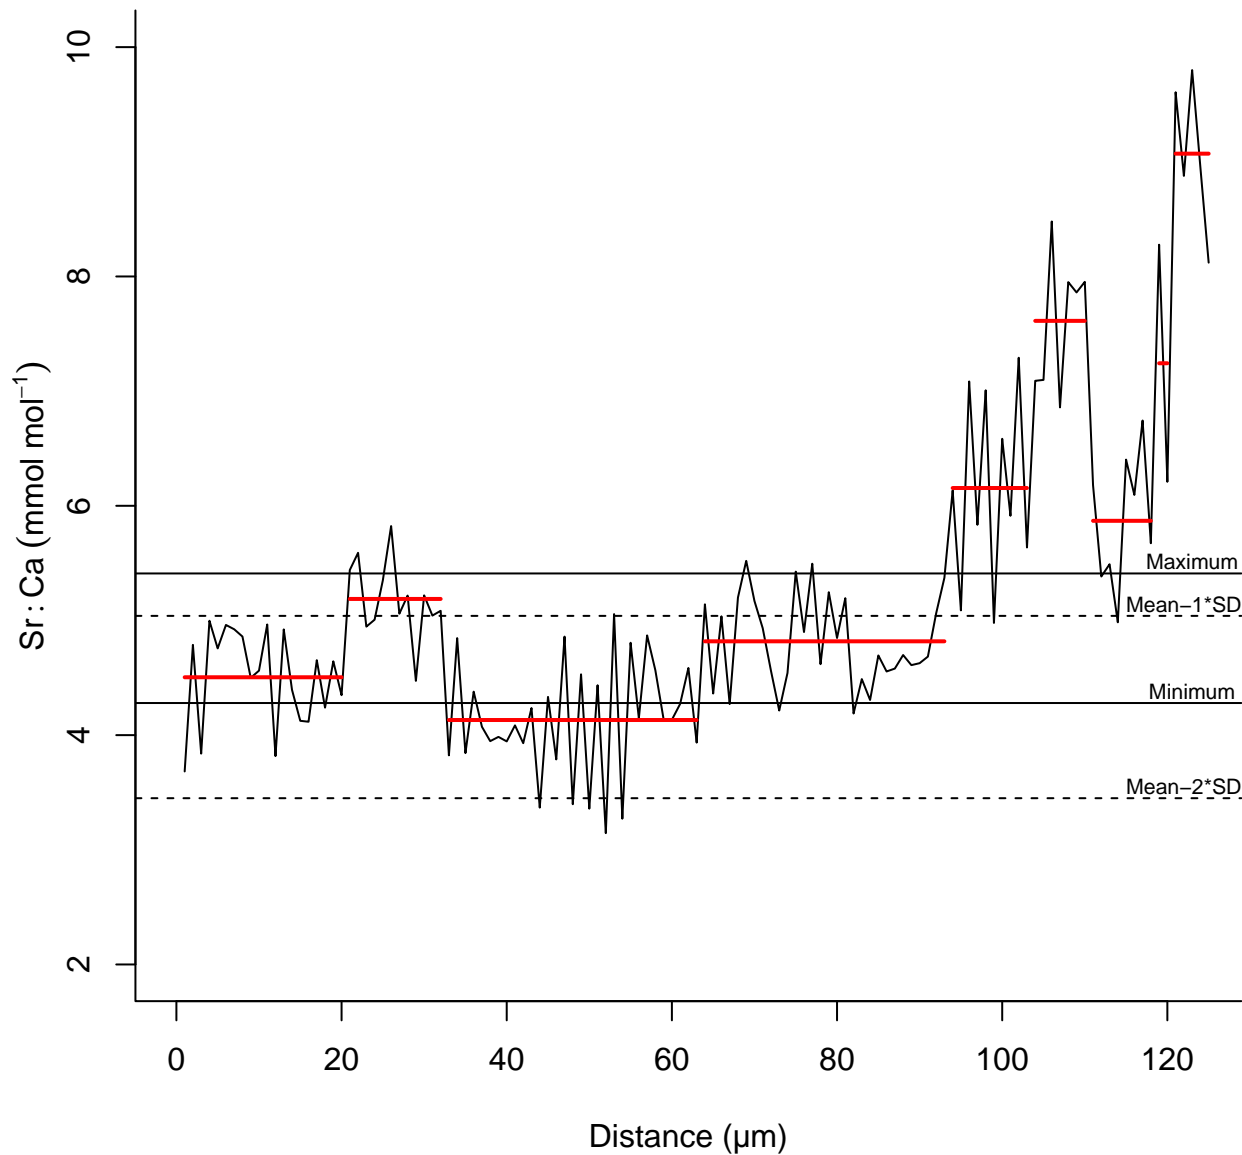

Supplement: s1 [file s1]

**C5**

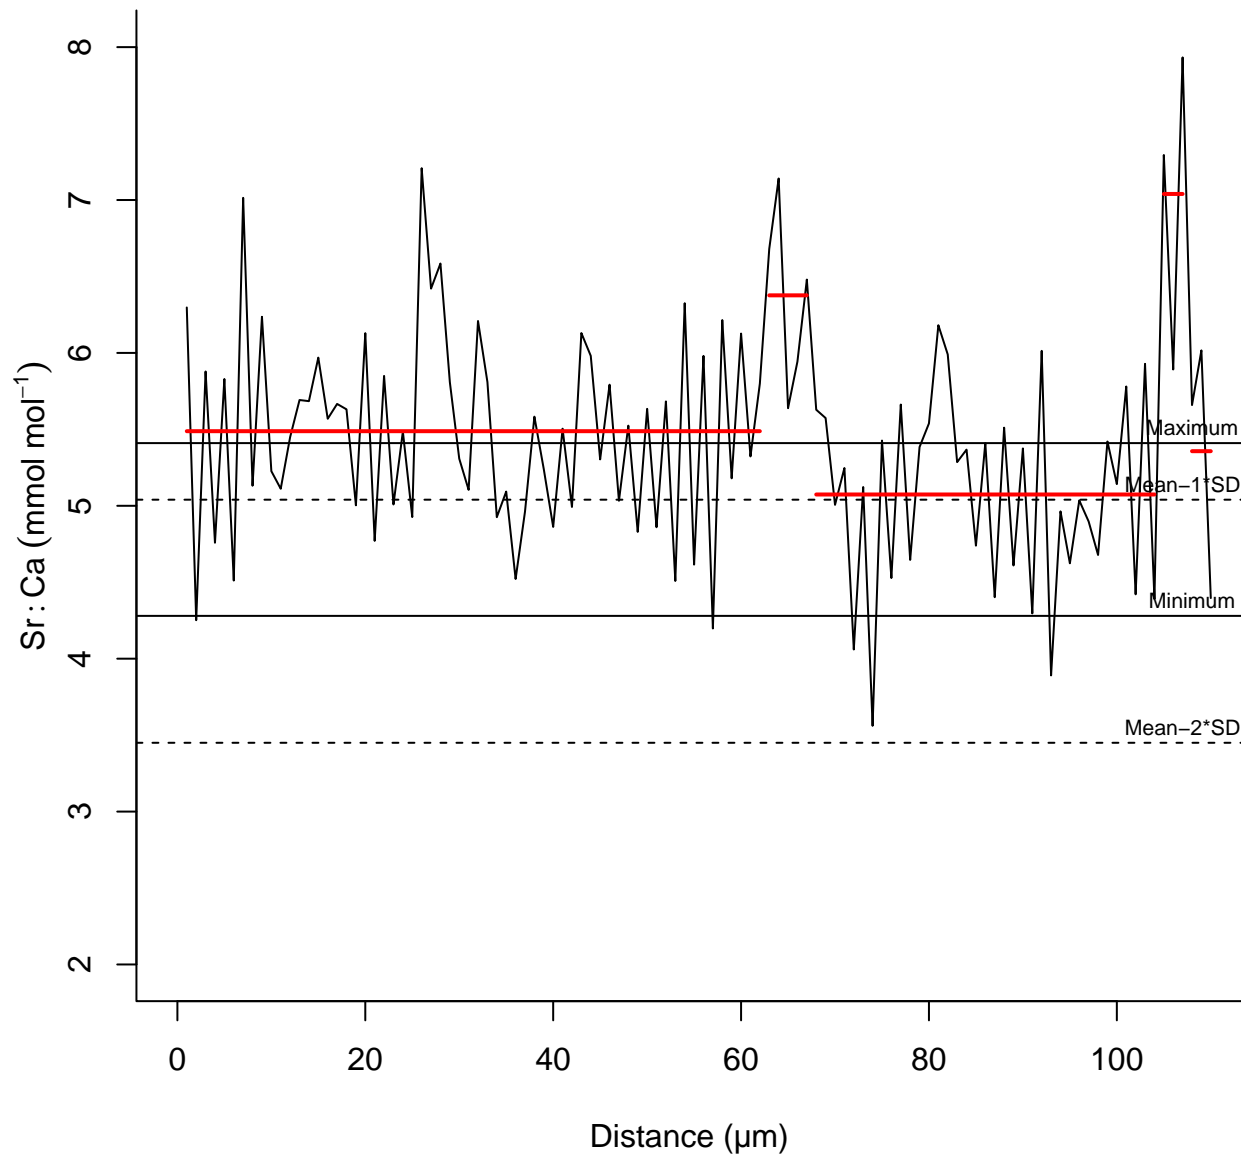

Supplement: s1 [file s1]

**B1**

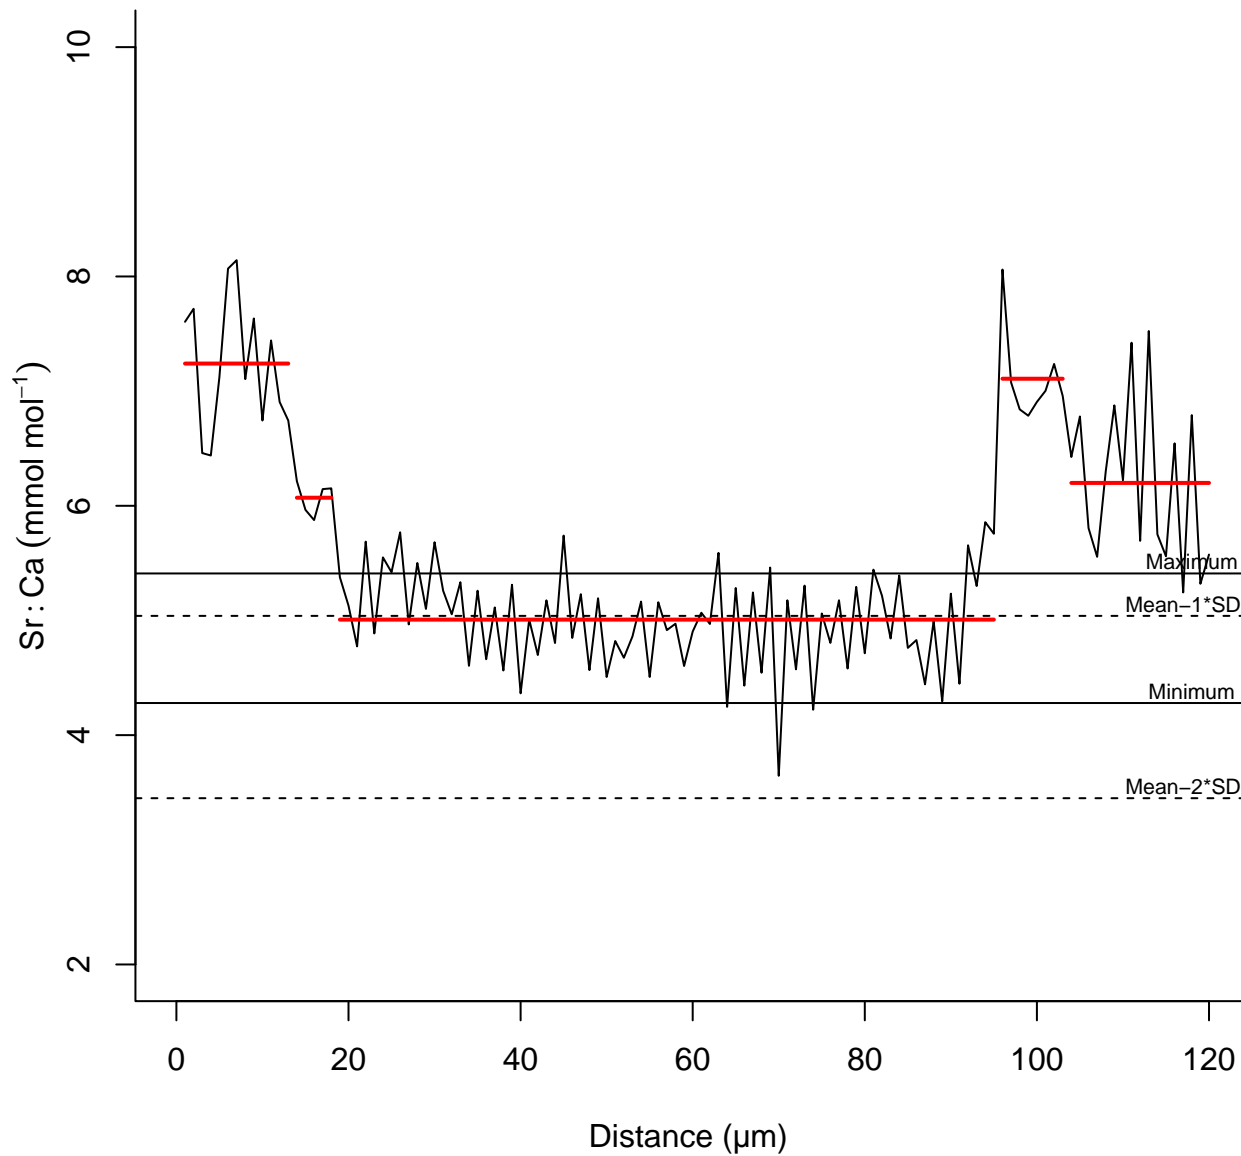

Supplement: s1 [file s1]

A1

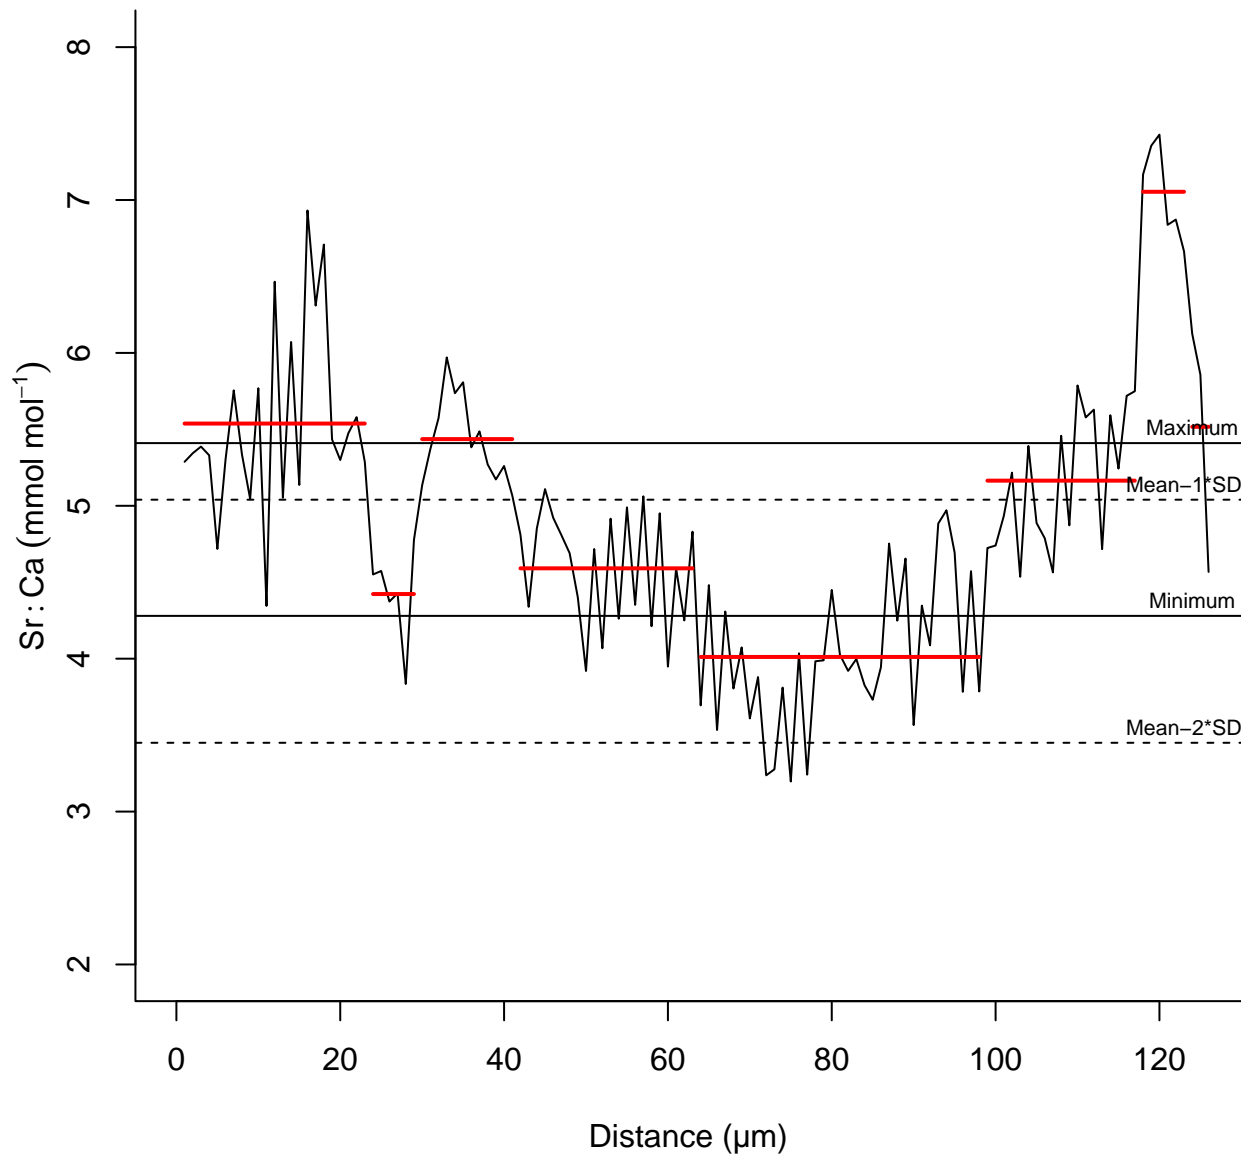

Supplement: s1 [file s1]

**D1**

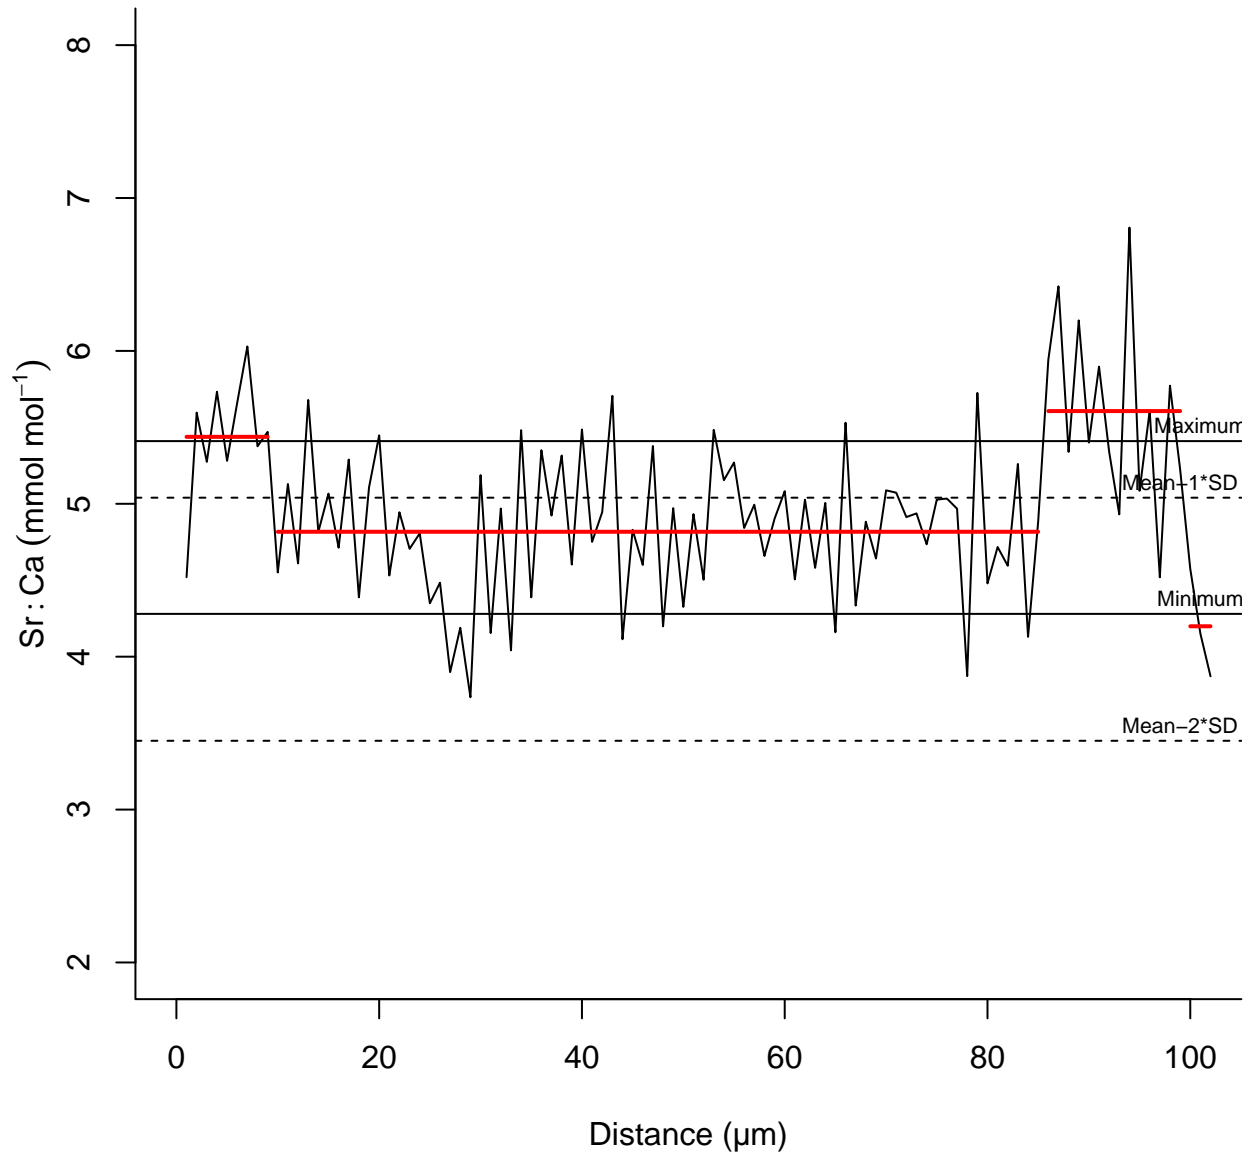

Supplement: s1 [file s1]

F1

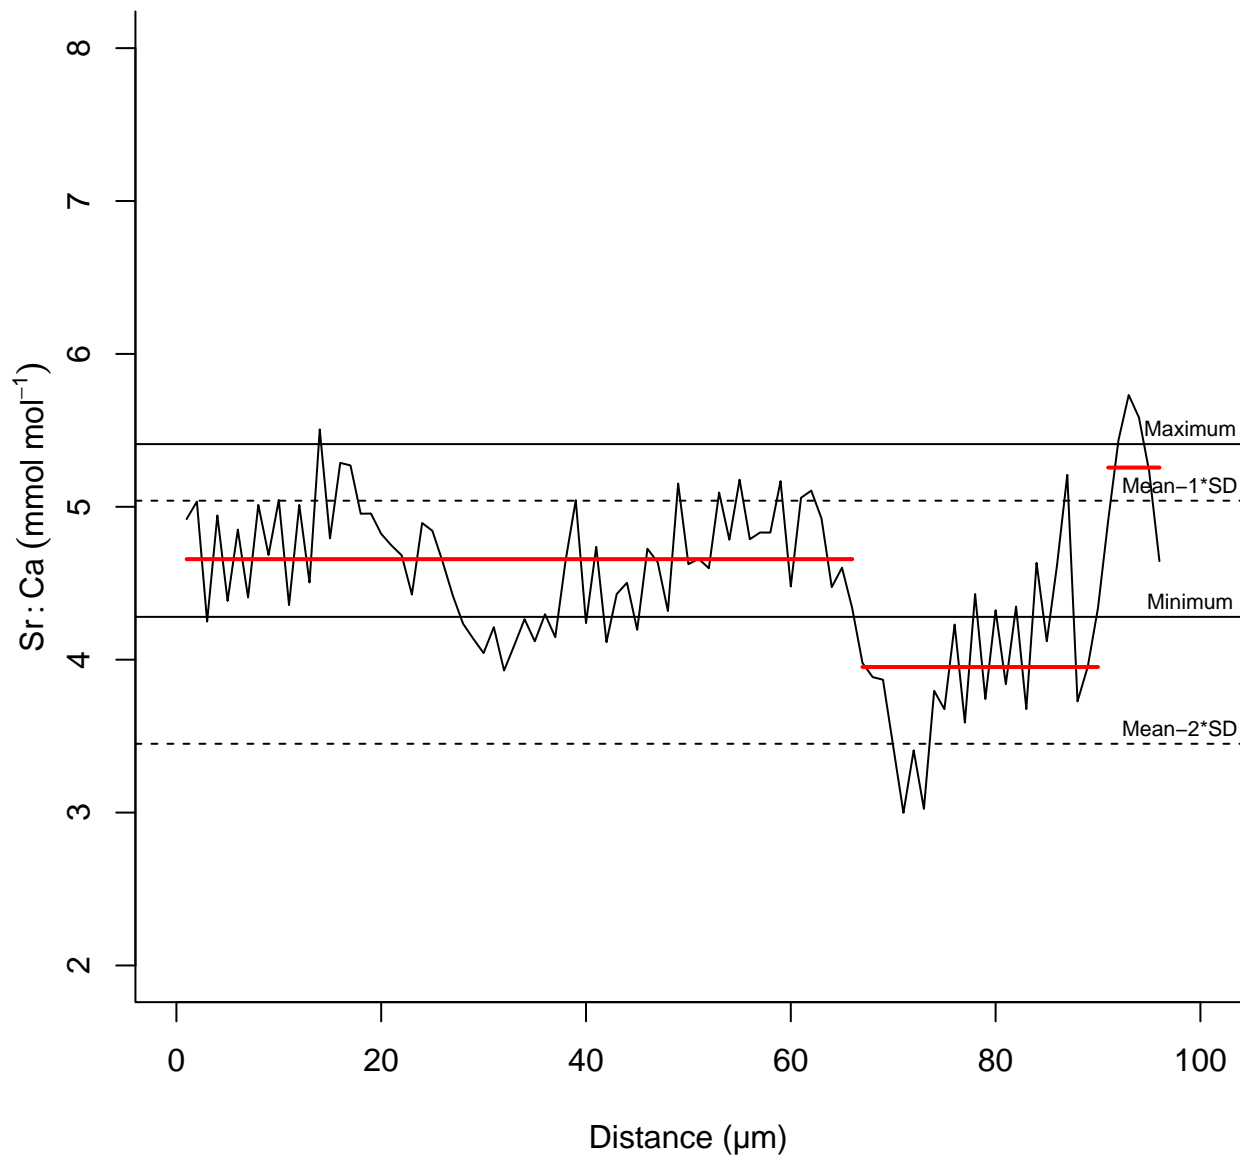

Supplement: s1 [file s1]

**C2**

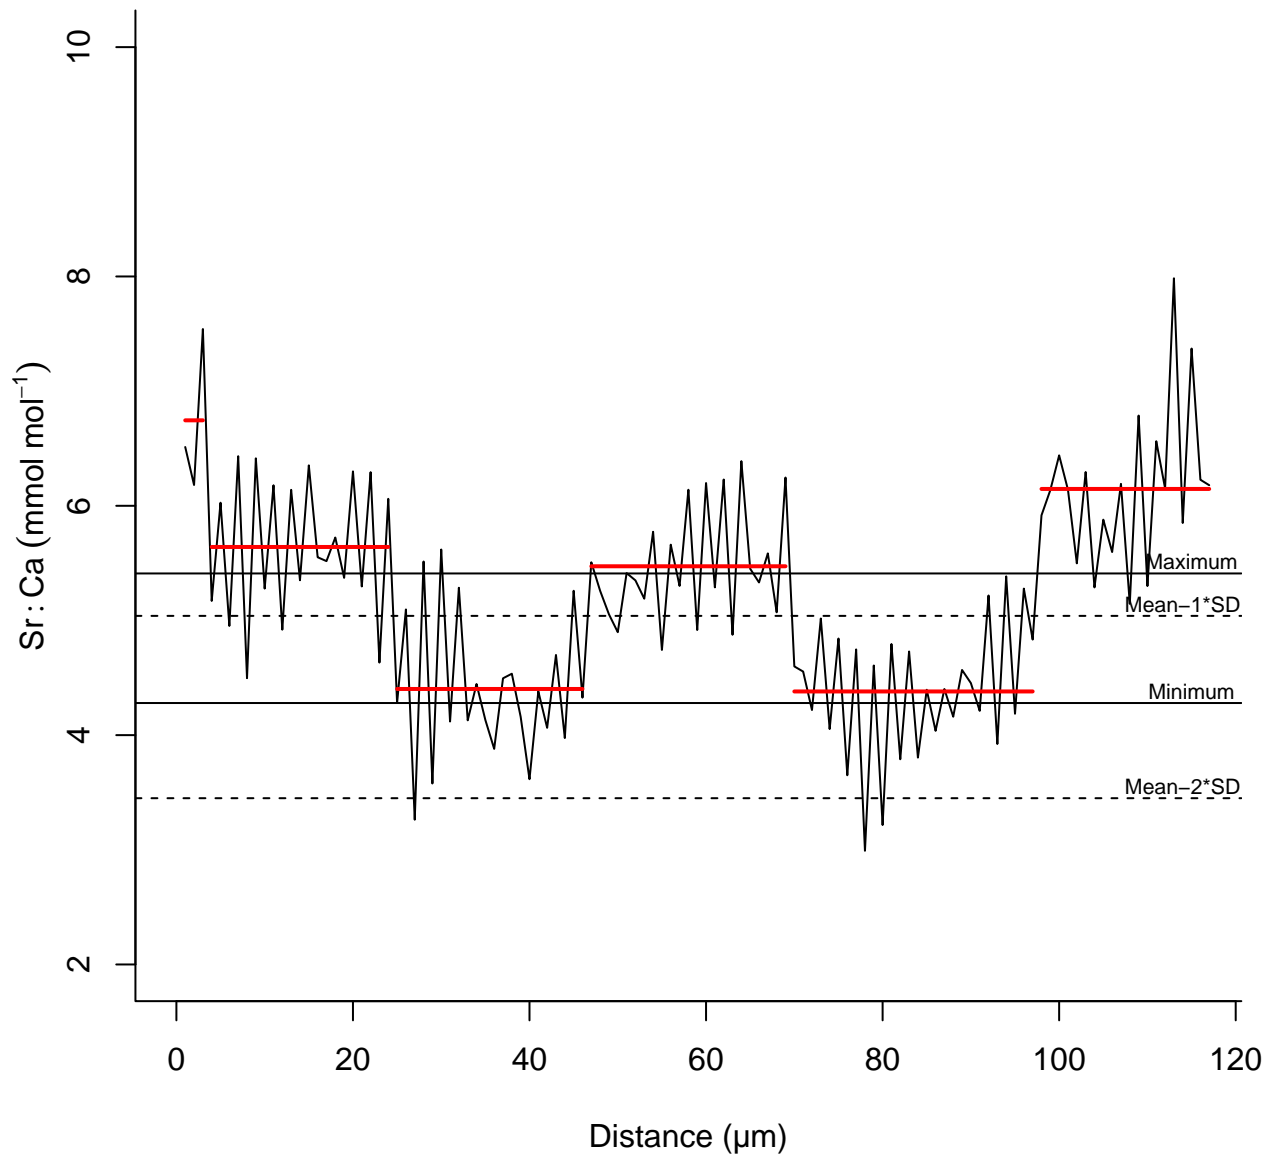

Supplement: s1 [file s1]

**E6**

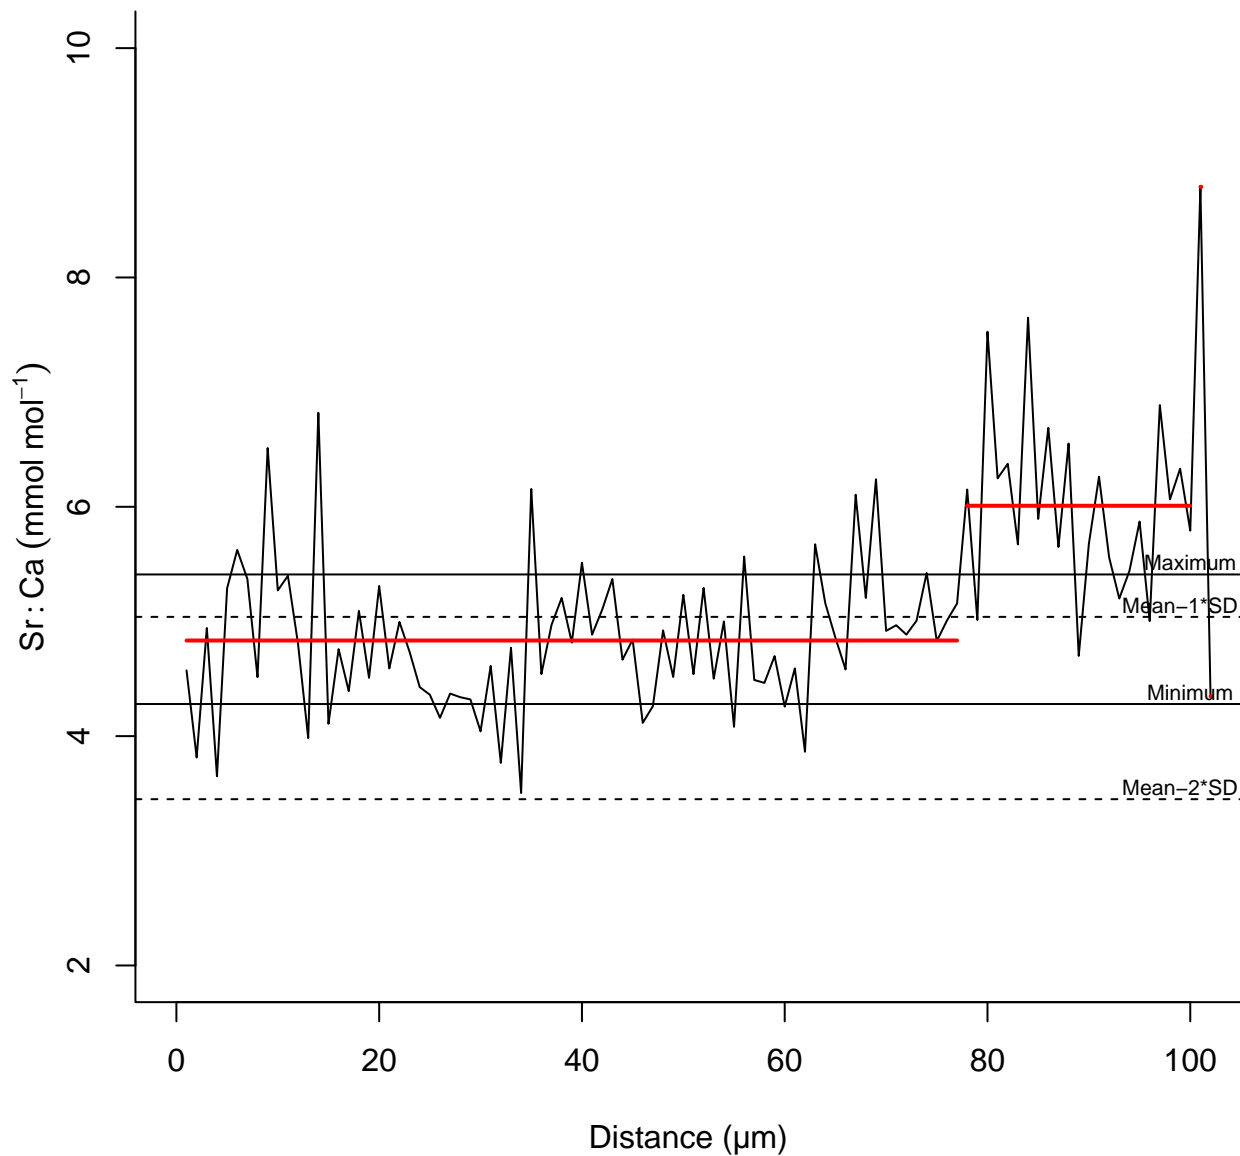

Supplement: s1 [file s1]

**C1**

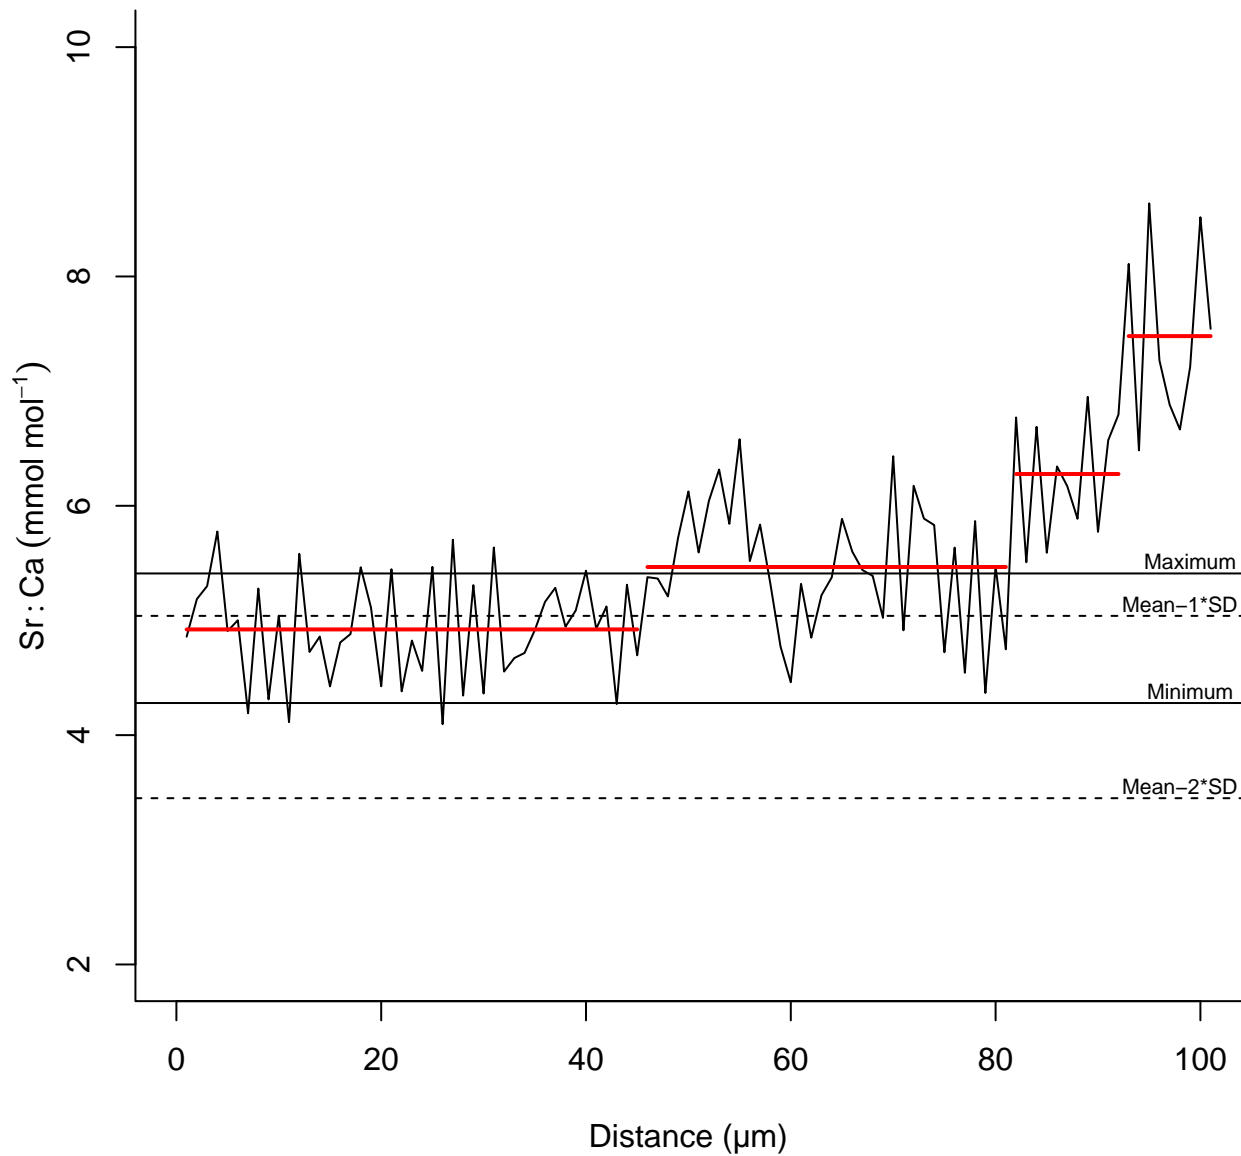

Supplement: s1 [file s1]

**B3**

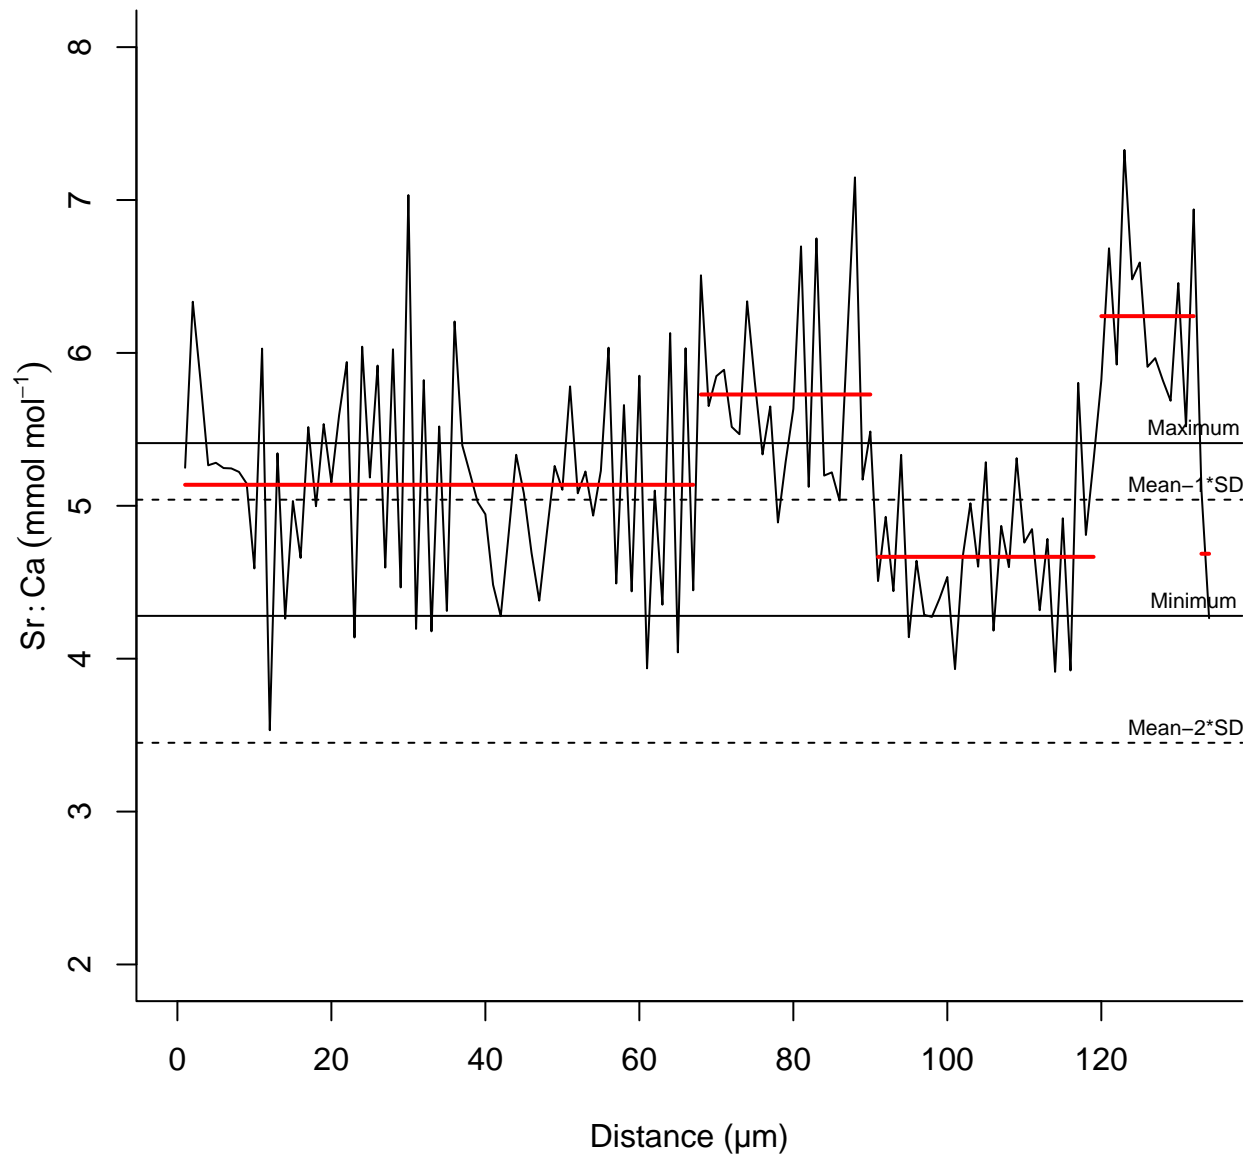

Supplement: s1 [file s1]

**B6**

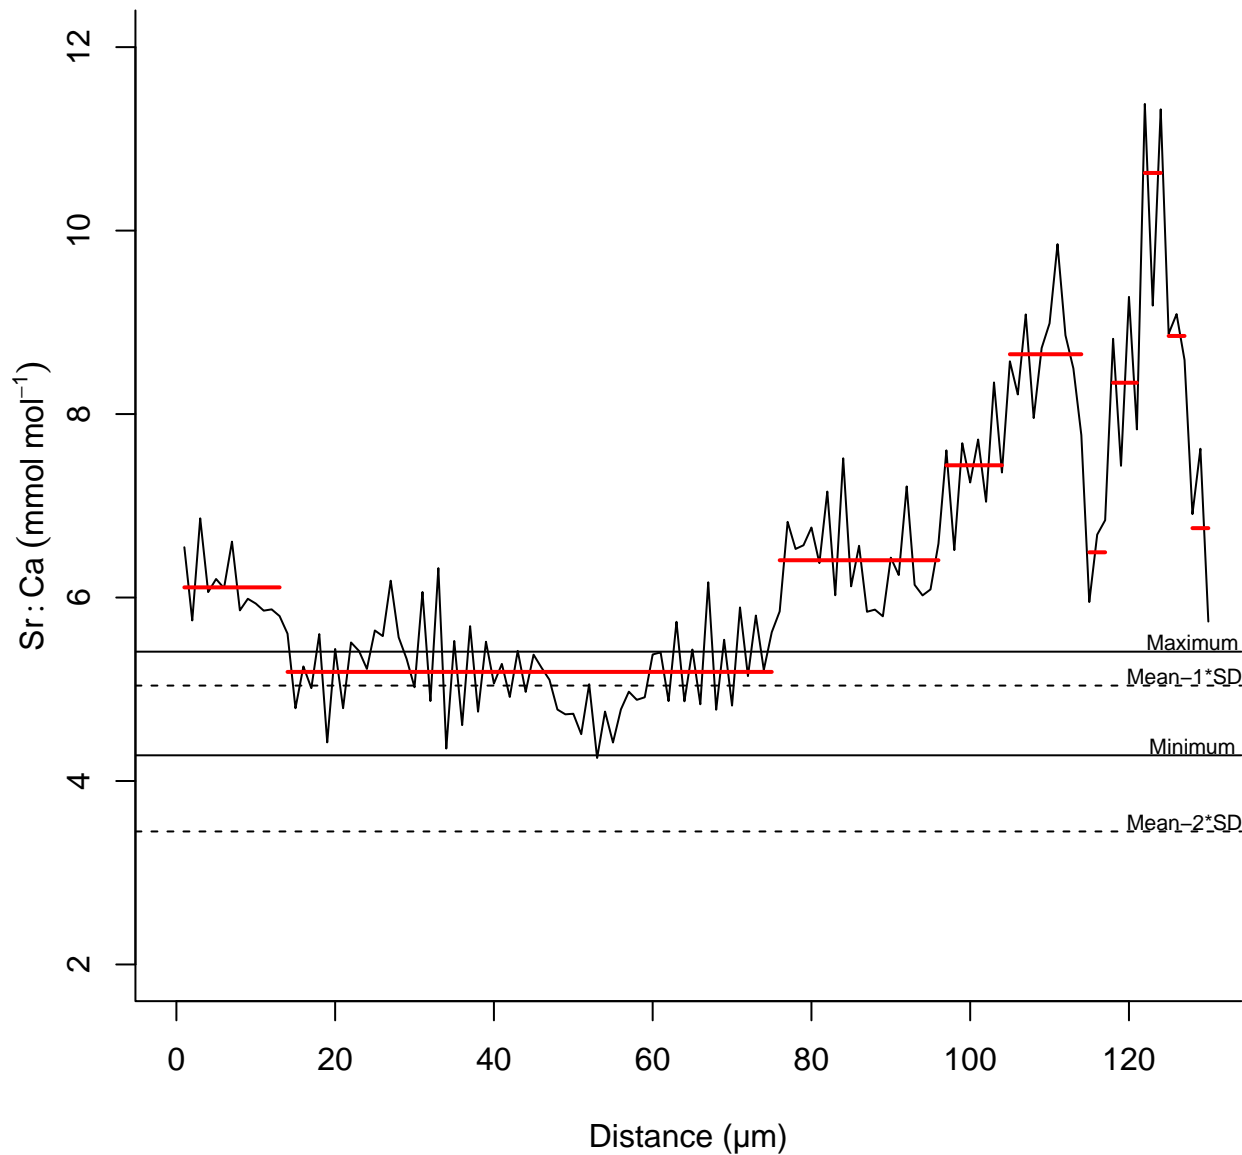

Supplement: s1 [file s1]

**E2**

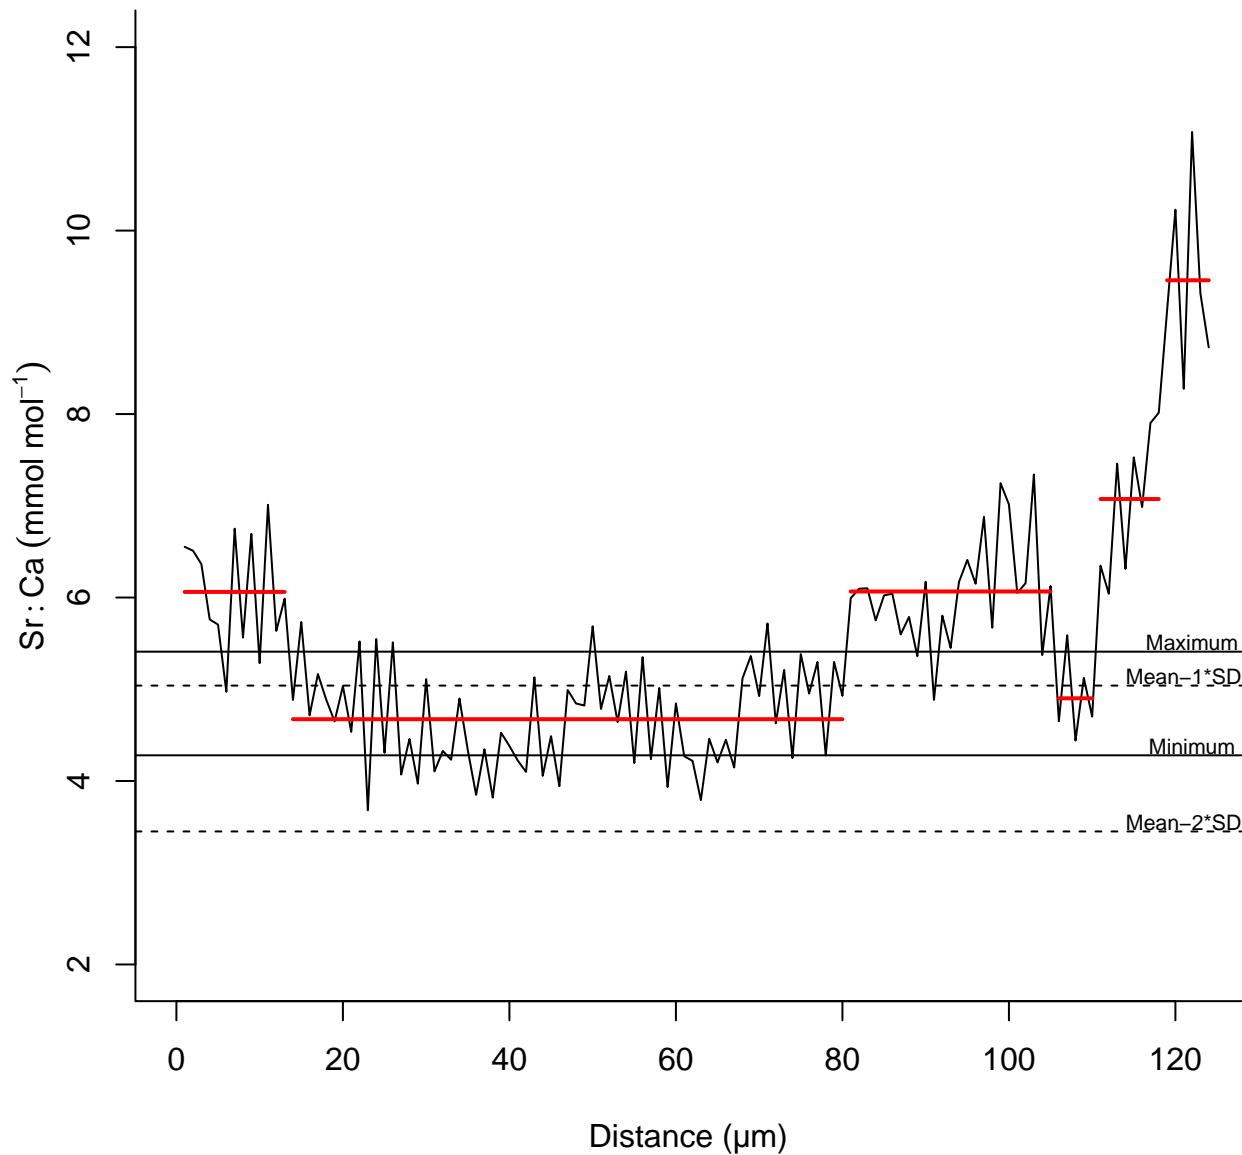

Supplement: s1 [file s1]

**E4**

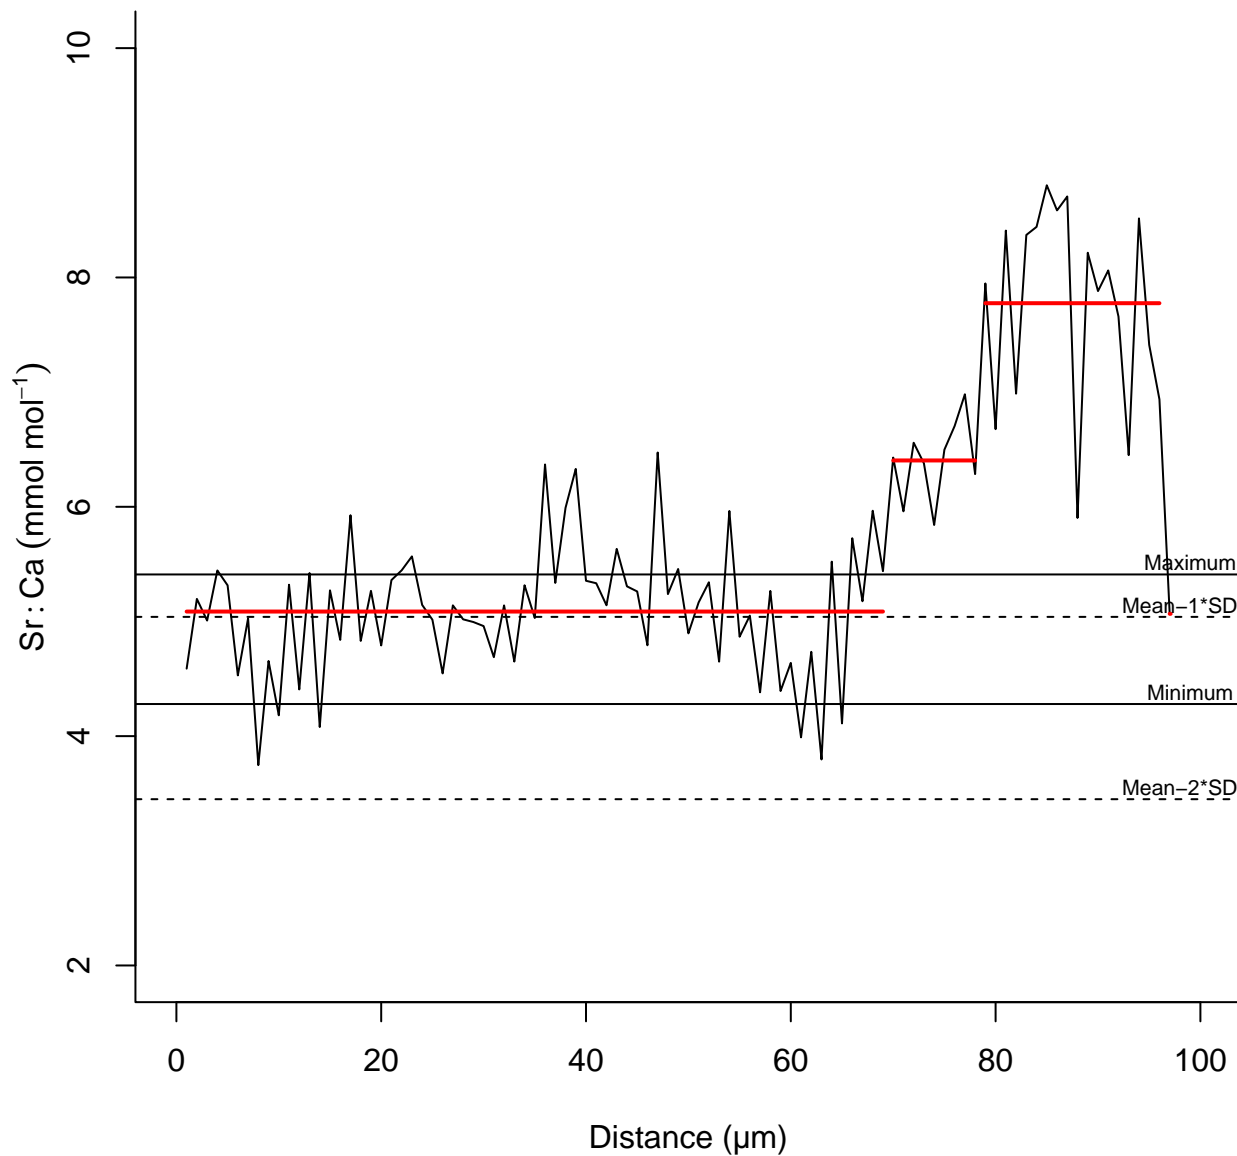

Supplement: s1 [file s1]

**D4**

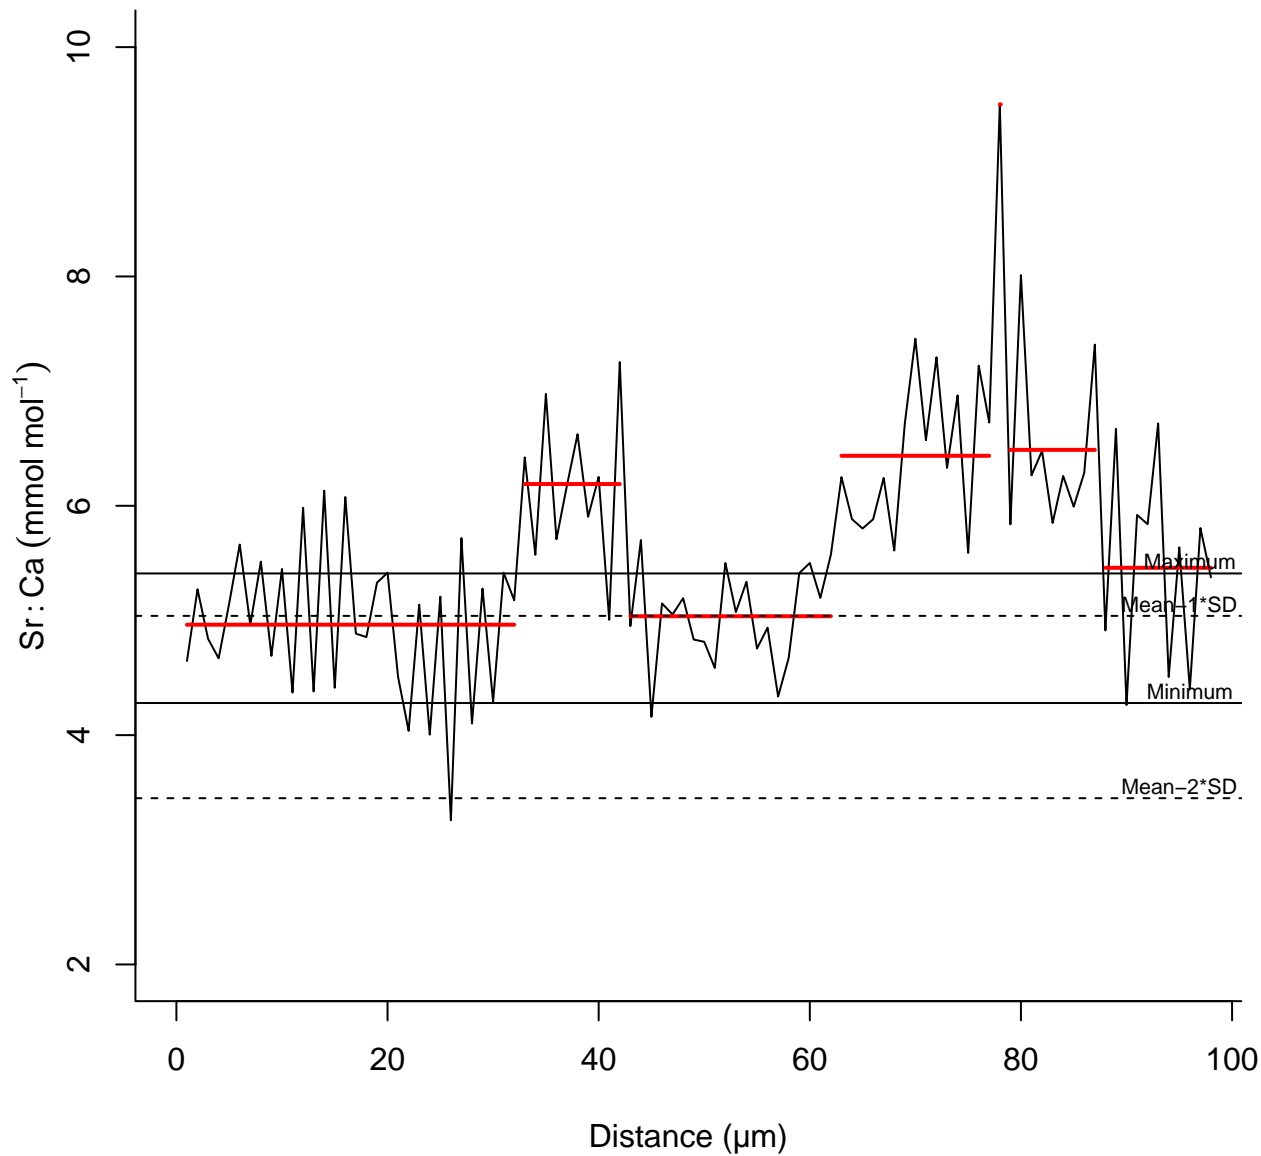

Supplement: s1 [file s1]

**B5**

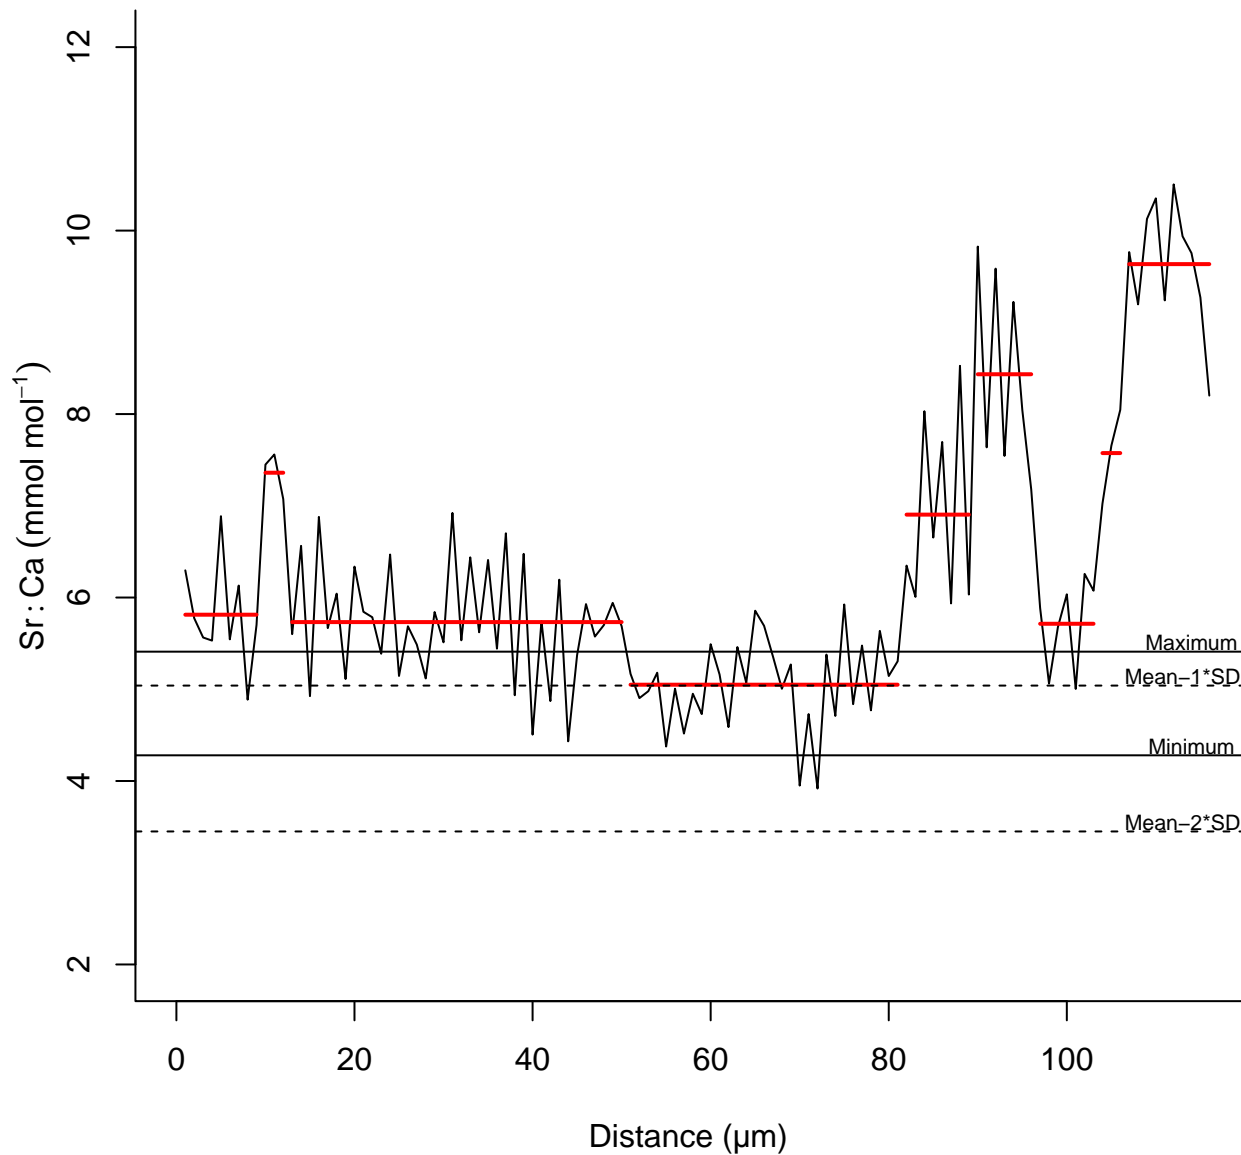

Supplement: s1 [file s1]
